# Supplementary material for: Two antagonistic response regulators control Pseudomonas aeruginosa polarization during mechanotaxis
Source: PubMed Central journal article supplement (PMC10519157; doi:10.15252/embj.2022112165), 2023-02-16
Supplement: EMBJ-42-e112165-s002.pdf [file EMBJ-42-e112165-s002.pdf]

## Appendix

Two antagonistic response regulators control *Pseudomonas aeruginosa* polarization during mechanotaxis.

## Authors

Marco J. Kühn<sup>1</sup>, Henriette Macmillan<sup>2</sup>, Lorenzo Talà<sup>1</sup>, Yuki Inclan<sup>2</sup>, Ramiro Patino<sup>2</sup>, Xavier Pierrat<sup>1</sup>, Zainebe Al-Mayyah<sup>1</sup>, Joanne N. Engel<sup>\*,2,3</sup> and Alexandre Persat<sup>\*,1</sup>

## Affiliations

<sup>1</sup>Institute of Bioengineering and Global Health Institute, School of Life Sciences, EPFL, Lausanne, Switzerland

<sup>2</sup>Department of Medicine, University of California, San Francisco, USA

<sup>3</sup>Department of Microbiology and Immunology, University of California, San Francisco, USA

\*Correspondence to: [alexandre.persat@epfl.ch](mailto:alexandre.persat@epfl.ch), [joanne.engel@ucsf.edu](mailto:joanne.engel@ucsf.edu)

## Content

- Appendix Figures S1-17
- Appendix Tables S1-4
- Appendix References

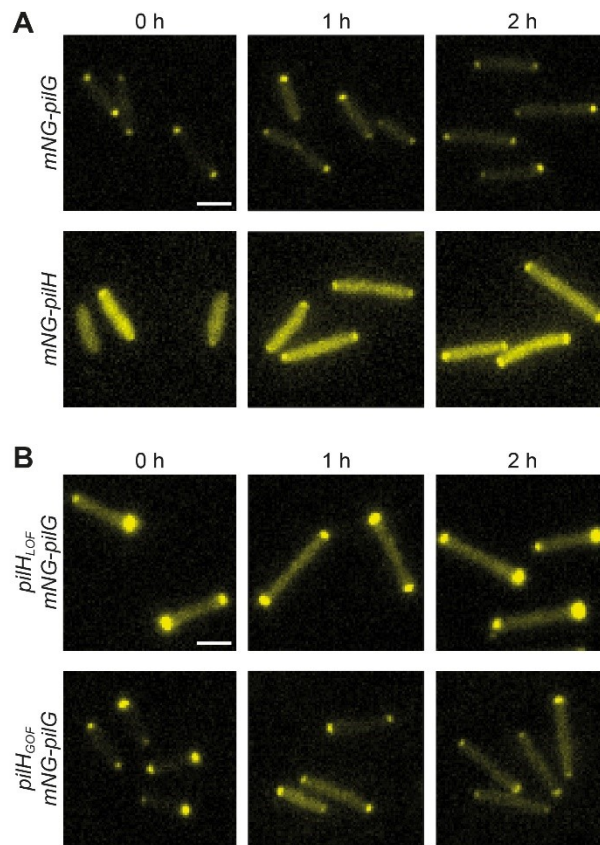

**Appendix Figure S1: Example fluorescence microscopy images of mNG-PilG and mNG-PilH in cells grown on a surface.** Cells were transferred from liquid culture to solid substrates and imaged immediately (0h) and after 1h and 2h in which the cells adapt to a surface-associated lifestyle. (A) Images correspond to data shown in Figure 1. (B) Images correspond to data shown in Figure 7. Scale bars, 2  $\mu$ m.

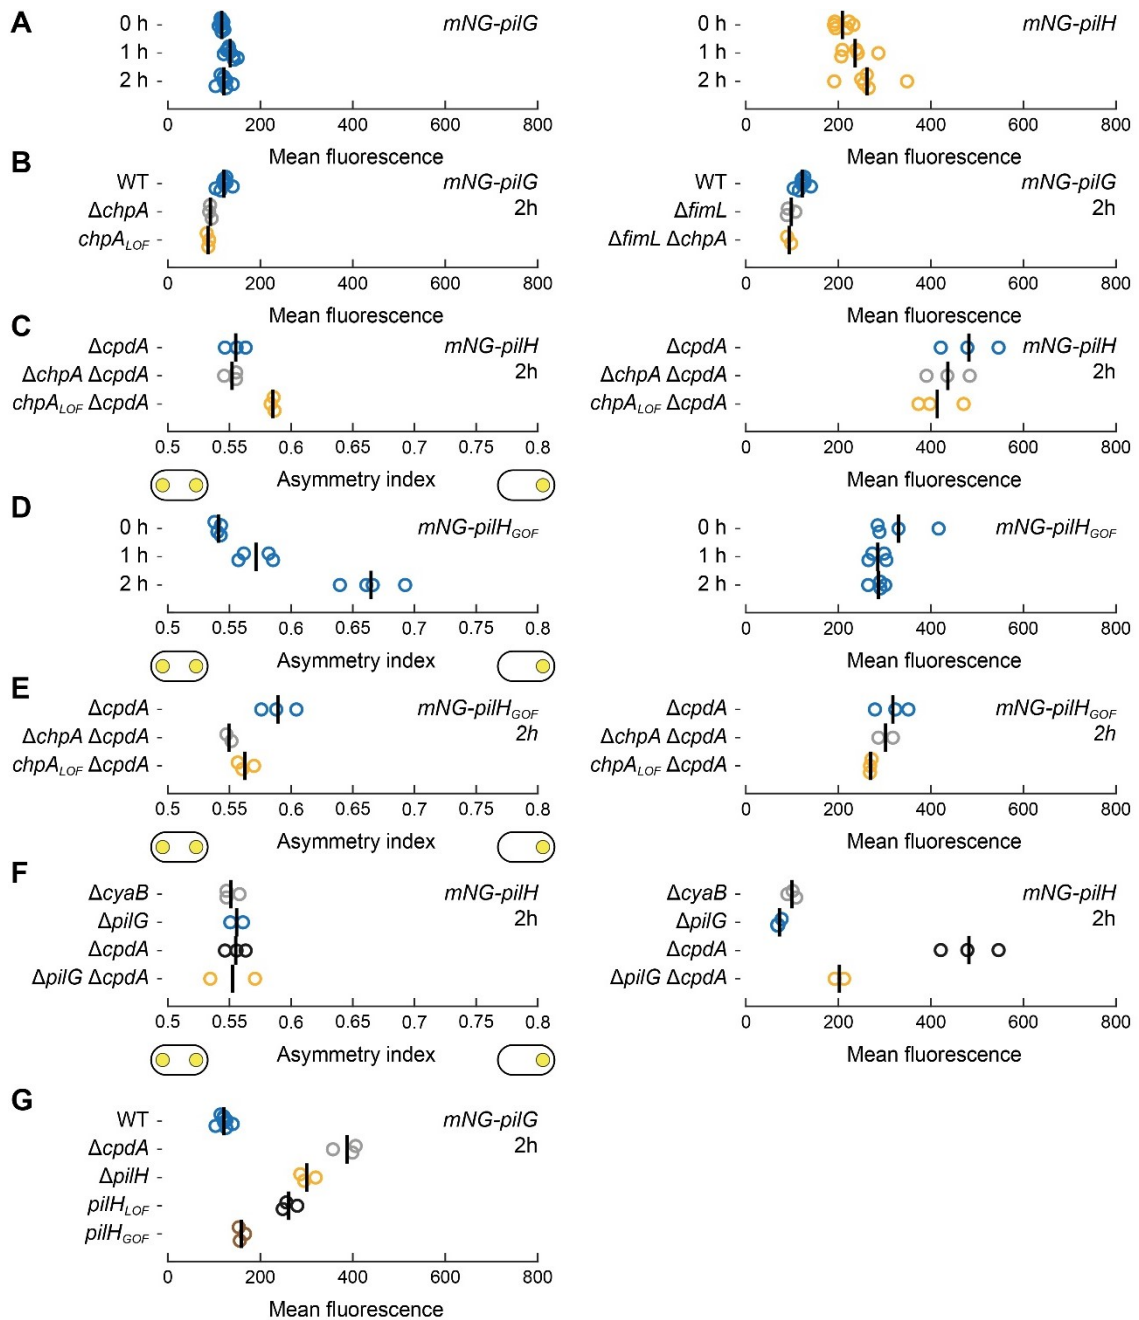

**Appendix Figure S2: Mean cell fluorescence and asymmetry indexes of mNG-PilG and mNG-PilH.** Panels correspond to main figures as follows: (A) Figure 1 (B) Figure 2 (C) Figure 3 (D) Figure 4AB (E) Figure 4CD (F) Figure 6 (G) Figure 7. Note, for panels C and E, *cpdA* was deleted in all display strains to rescue cAMP levels and mitigate the negative effects caused by low cAMP. Circles, median of each biological replicate. Vertical bars: mean across biological replicates.

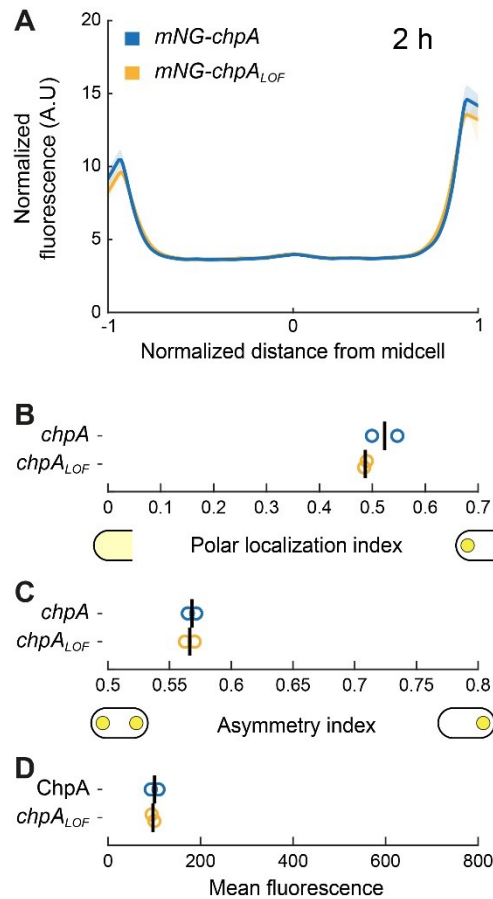

**Appendix Figure S3: ChpA and ChpA<sub>LOF</sub> localize similarly to the poles.** (A) Average fluorescence profiles of mNG-ChpA after 2h surface growth. Note, wild-type mNG-tagged ChpA is non-functional (0 moving cells found in 97 tracked cells) like the loss-of-function mutant *chpA<sub>LOF</sub>* (2 moving cells found in 254 tracked cells). (B) Quantification of polar localization, (C) asymmetry index and (D) mean cellular fluorescence. Solid lines, mean normalized fluorescence profiles across biological replicates. Shaded area, standard deviation across biological replicates. Circles, median of each biological replicate. Vertical bars, mean across biological replicates.

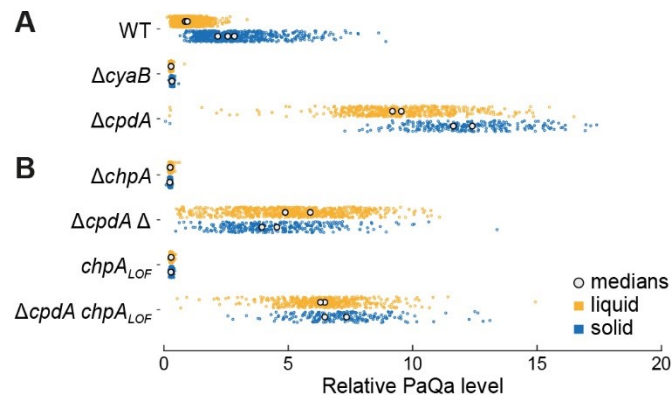

**Appendix Figure S4: Quantification of cAMP levels of *chpA* mutants measured by PaQa-YFP reporter fluorescence.** (A) Relative cAMP levels measured by PaQa reporter fluorescence in deletion mutants of the cAMP production cycle.  $\Delta cyaB$  results in constitutively low and  $\Delta cpdA$  in constitutively high cAMP levels. The cAMP level of  $\Delta cpdA$  increases on surfaces, likely due to increased activity of the adenylate cyclase CyaB (Fulcher *et al*, 2010). (B) Relative cAMP levels of  $\Delta chpA$ , the histidine kinase of the Chp system, and  $chpA_{LOF}$ . Note, deletion of *cpdA* partially rescues the low cAMP level of *chpA* mutants, however, cAMP levels don't reach the high cAMP levels of  $\Delta cpdA$ . Very likely, CyaB doesn't get activated in *chpA cpdA* double mutants (Fulcher *et al*, 2010). Therefore, cAMP levels don't increase upon surface contact. Colored circles represent measurements of single cells, white circles correspond to medians of biological replicates. All displayed strains are in  $\Delta fliC$  background.

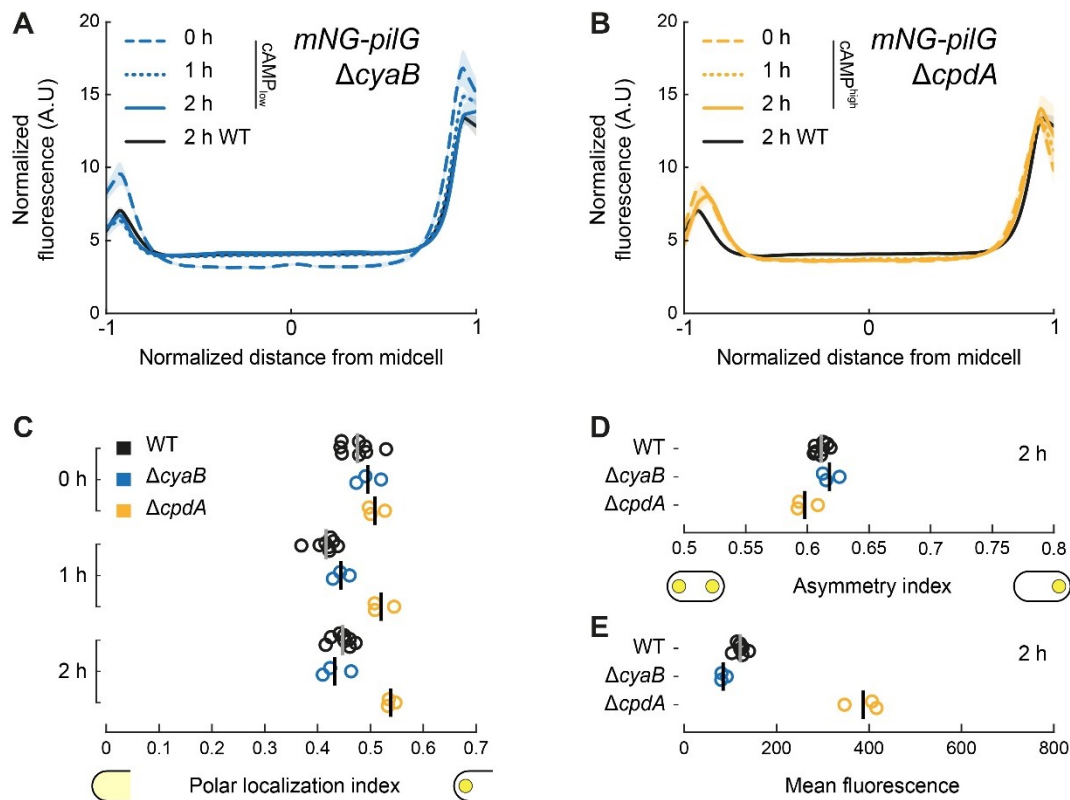

**Appendix Figure S1: Time course of cAMP-dependent localization of mNG-PilG in cells grown on solid substrate.** Average fluorescence profiles of mNG-PilG in (A) low and (B) high cAMP. Quantification of (C) polar localization, (D) asymmetry index and (E) mean cellular fluorescence. In low cAMP ( $\Delta cyaB$ ), the localization pattern as well as the decrease of polar localization over time is almost identical to WT. Data from Figure 1D included for comparison (black). Note, WT refers to a strain without *cyaB* or *cpdA* deletion. In high cAMP ( $\Delta cpdA$ ), polar localization of PilG is comparable to WT at 0h; however, it remains high over time. The higher polar localization is due to increased localization to the dim pole (at  $x = -1$ , panel B) which is reflected by a slightly lower asymmetry index (D), i.e. more symmetric localization. The fluorescent signal of mNG-PilG, as a proxy for protein concentration, is largely unaffected by low cAMP; however, it is strongly increased in high cAMP. Solid lines, mean normalized fluorescence profiles across biological replicates. Shaded area, standard deviation across biological replicates. Circles, median of each biological replicate. Vertical bars, mean across biological replicates.

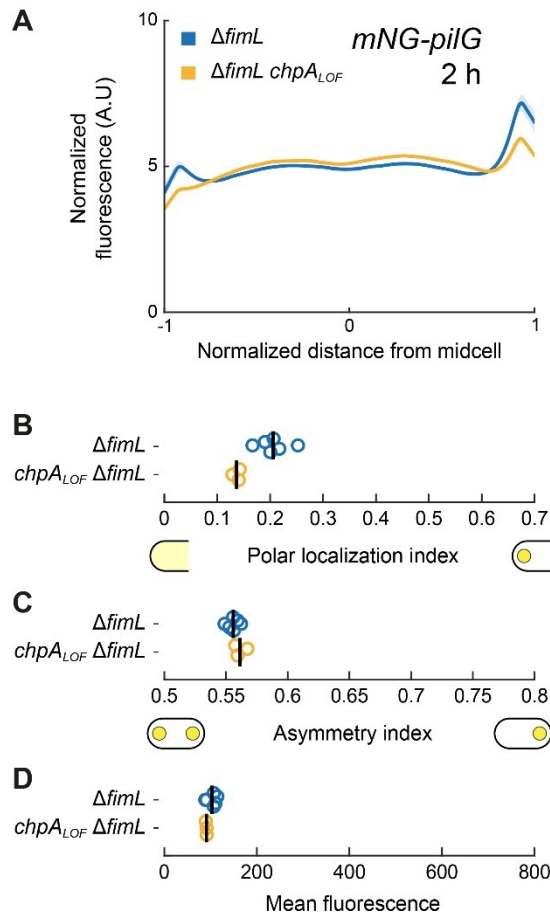

**Appendix Figure S6: ChpA plays a role in recruiting PilG independently of phosphorylation.** (A) Average fluorescence profiles of mNG-PilG after 2h surface growth. In  $\Delta fimL$ , PilG is recruited to the poles only by ChpA. Without the ability to phosphorylate, ChpA<sub>LOF</sub> still recruits PilG, although to a lesser extent than wild-type ChpA. (B) Quantification of polar localization, (C) asymmetry index and (D) mean cellular fluorescence. Solid lines, mean normalized fluorescence profiles across biological replicates. Shaded area, standard deviation across biological replicates. Circles, median of each biological replicate. Vertical bars, mean across biological replicates.

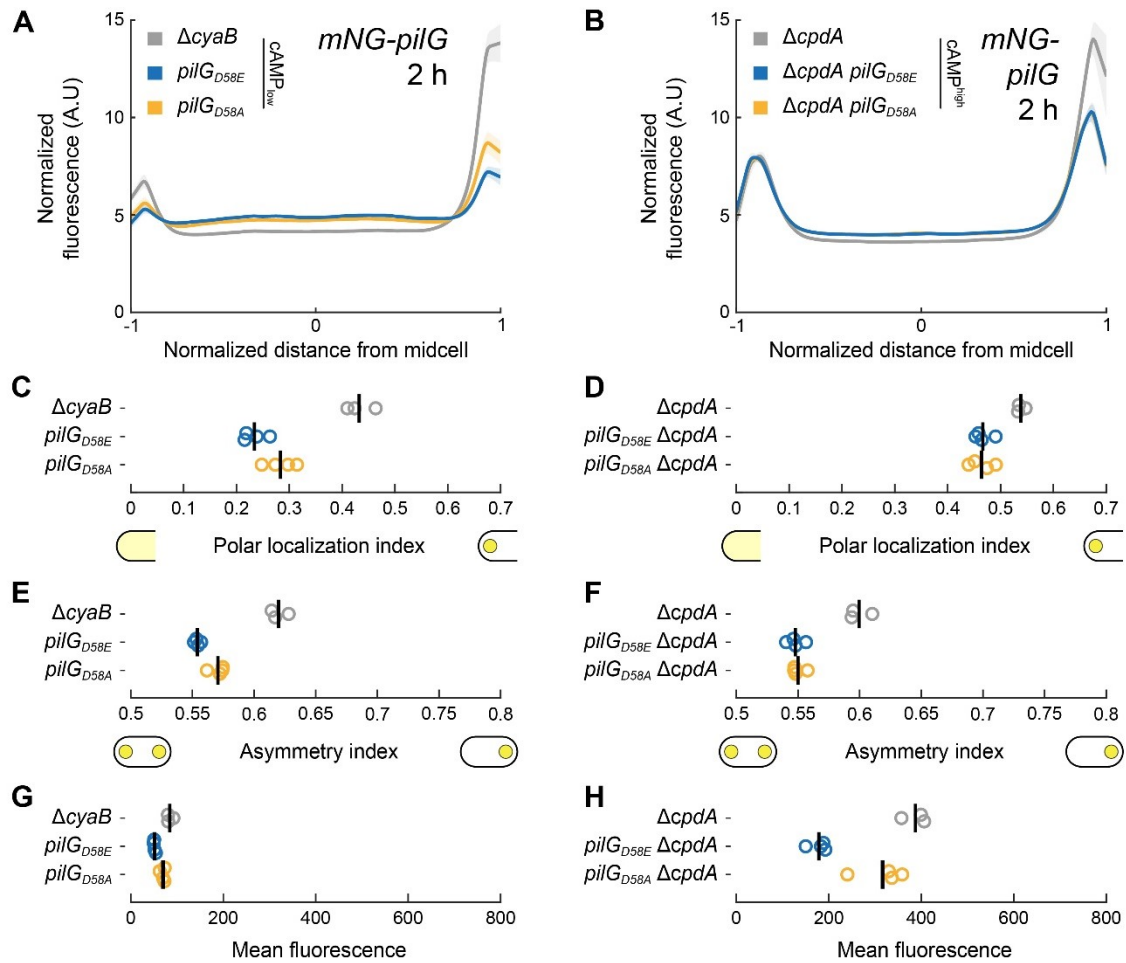

**Appendix Figure S7: PilG<sub>D58A</sub> and PilG<sub>D58E</sub> similarly localize to the poles.** Average fluorescence profiles of mNG-PilG point mutants after 2h surface growth in (A) low and (B) high cAMP. (C,D) Quantification of polar localization, (E,F) asymmetry index and (G,H) mean cellular fluorescence. Polar localization and asymmetry indexes of PilG<sub>D58A</sub> and PilG<sub>D58E</sub> are decreased compared to WT in low cAMP. Polar localization differs only slightly between the mutants, and the differences disappear in high-cAMP. Solid lines, mean normalized fluorescence profiles across biological replicates. Shaded area, standard deviation across biological replicates. Circles, median of each biological replicate. Vertical bars, mean across biological replicates.



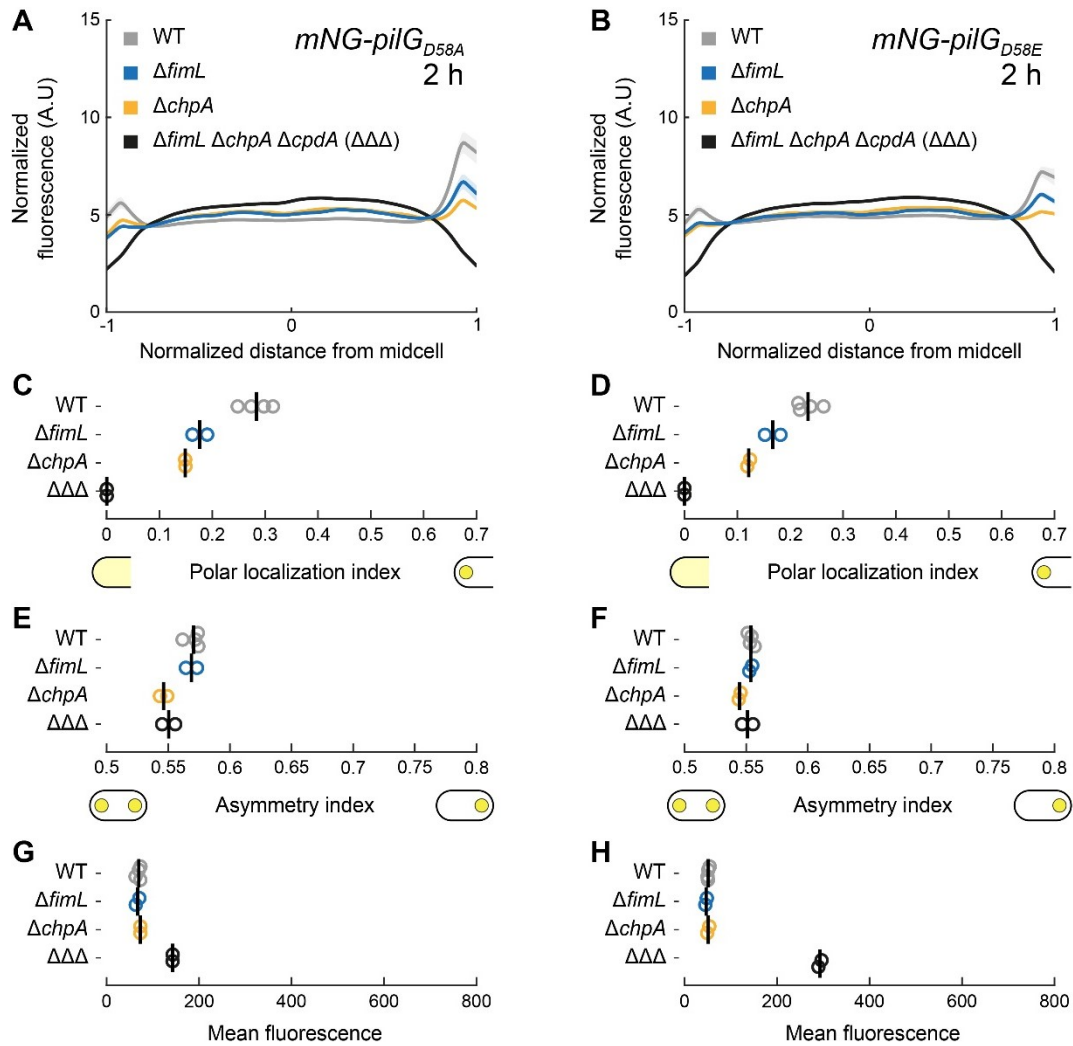

**Appendix Figure S8: D58A and D58E mutations of PilG do not interfere with FimL- and ChpA-dependent recruitment.** Average fluorescence profiles of (A) mNG-PilG<sub>D58A</sub> and mNG-PilG<sub>D58E</sub> (B) after 2h surface growth. Polar localization of both point mutants similarly depends on FimL and ChpA, comparable to wild-type PilG. (C,D) Quantification of polar localization, (E,F) asymmetry index and (G,H) mean cellular fluorescence of PilG<sub>D58A</sub> and mNG-PilG<sub>D58E</sub>, respectively.  $\Delta\Delta\Delta$  refers to strain  $\Delta fimL \Delta chpA \Delta cpdA$ . Solid lines, mean normalized fluorescence profiles across biological replicates. Shaded area, standard deviation across biological replicates. Circles, median of each biological replicate. Vertical bars, mean across biological replicates.

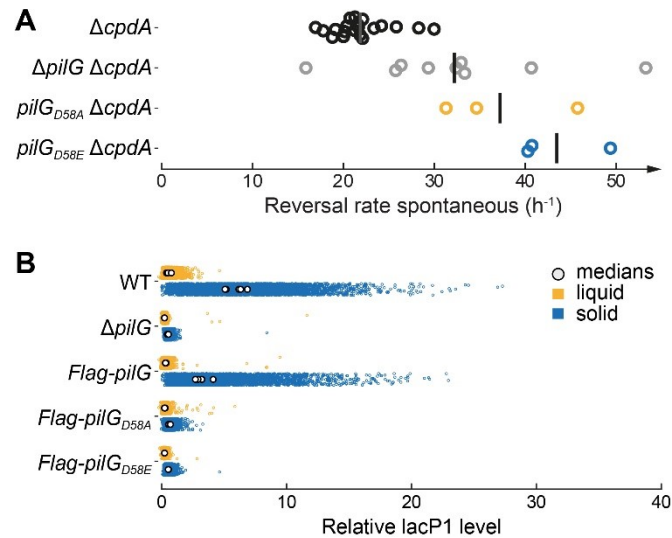

**Appendix Figure S9: Reversal rates and cAMP production of  $pilG_{D58}$  point mutants.**

(A) Spontaneous reversal rates of  $pilG_{D58A}$  and  $pilG_{D58E}$  mutants. To bypass low cAMP levels  $cpdA$  was deleted in all displayed strains. Both  $pilG$  mutants show increased reversals rates similar to  $\Delta pilG$  Indicating a loss of function. (B) Quantification of cAMP levels measured by PlacP1-YFP reporter fluorescence. Low cAMP levels of both  $pilG$  mutants confirm that both point mutations result in a loss of function. The Flag tag alone does not confound the cAMP measurements. Colored circles represent measurements of single cells, white circles correspond to medians of biological replicates.

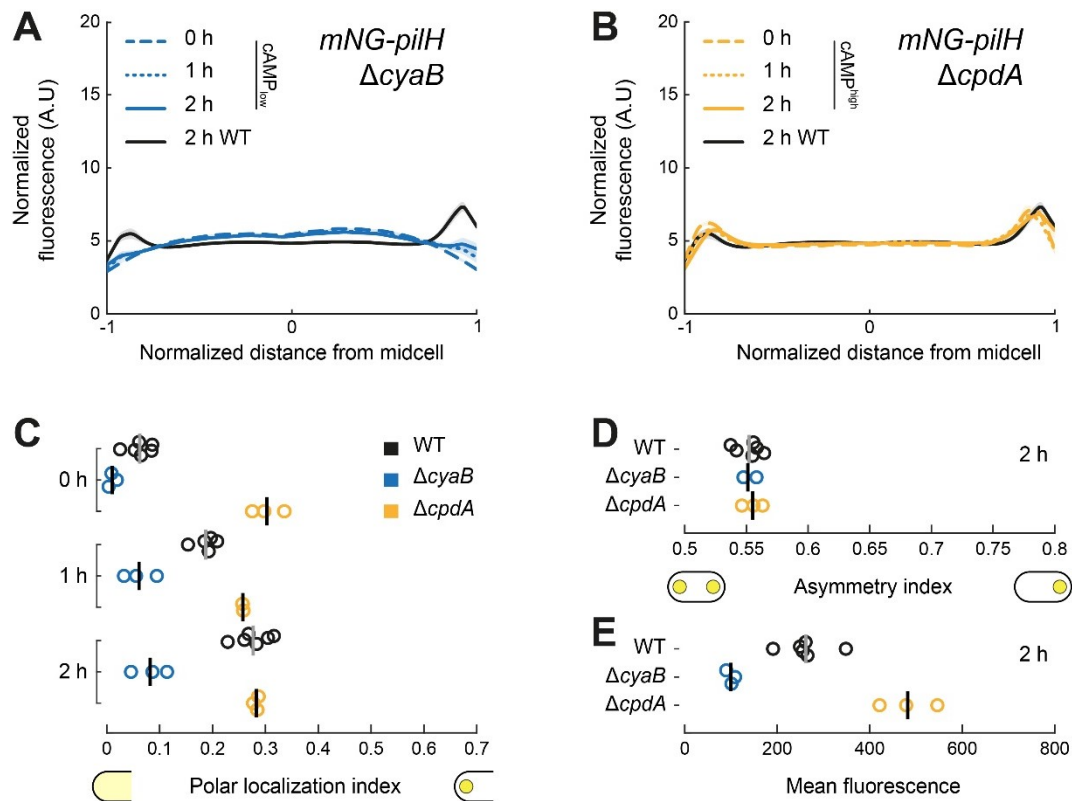

**Appendix Figure S10: Time course of cAMP-dependent localization of mNG-PilH in cells grown on solid substrate.** Average fluorescence profiles of mNG-PilH in (A) low and (B) high cAMP, respectively. Quantification of (C) polar localization, (D) asymmetry index and (E) mean cellular fluorescence. In low cAMP ( $\Delta cyaB$ ), polar localization is generally reduced, however, recruitment of PilH to the poles over time still takes place. In high cAMP ( $\Delta cpdA$ ), polar localization is always as high as in WT after 2h surface growth. Data from Figure 1 included for comparison (black). Note, WT refers to a strain without *cyaB* or *cpdA* deletion. The fluorescent signal of mNG-PilH, as a proxy for protein concentration, is proportional to the cAMP level in *cyaB* and *cpdA* mutants (cf. Appendix Figure S4A). Solid lines, mean normalized fluorescence profiles across biological replicates. Shaded area, standard deviation across biological replicates. Circles, median of each biological replicate. Vertical bars, mean across biological replicates.

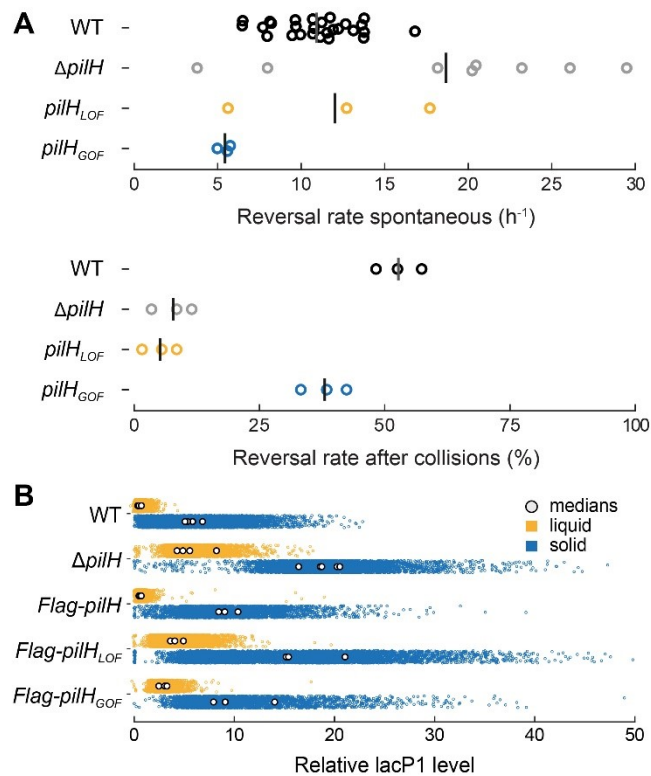

**Appendix Figure S11: Reversal rates and cAMP production of loss- and gain-of-function mutants of PilH.** (A) Spontaneous reversal rates and reversal rates after collision of  $pilH_{LOF}$  and  $pilH_{GOF}$  mutants.  $\Delta pilH$  and  $pilH_{LOF}$  show low to almost no reversals (see also (Kühn *et al*, 2021)).  $pilH_{GOF}$  rescues reversal rates, however, doesn't fully restore wild-type rates. Because of high pili number in mutants with high cAMP level resulting in erratic movement of cells, spontaneous reversals rates are not measured very precisely by our algorithm. Manually counted reversal rates after collision give a better estimate.  $\Delta pilH$  collision data from (Kühn *et al*, 2021). (B) Quantification of cAMP levels measured by PlacP1-YFP reporter fluorescence. cAMP levels of  $pilH_{LOF}$  are comparable to  $\Delta pilH$ , whereas  $pilH_{GOF}$  partially rescues cAMP to intermediate levels between WT and  $\Delta pilH$  or  $pilH_{LOF}$ . Colored circles represent measurements of single cells, white circles correspond to medians of biological replicates.

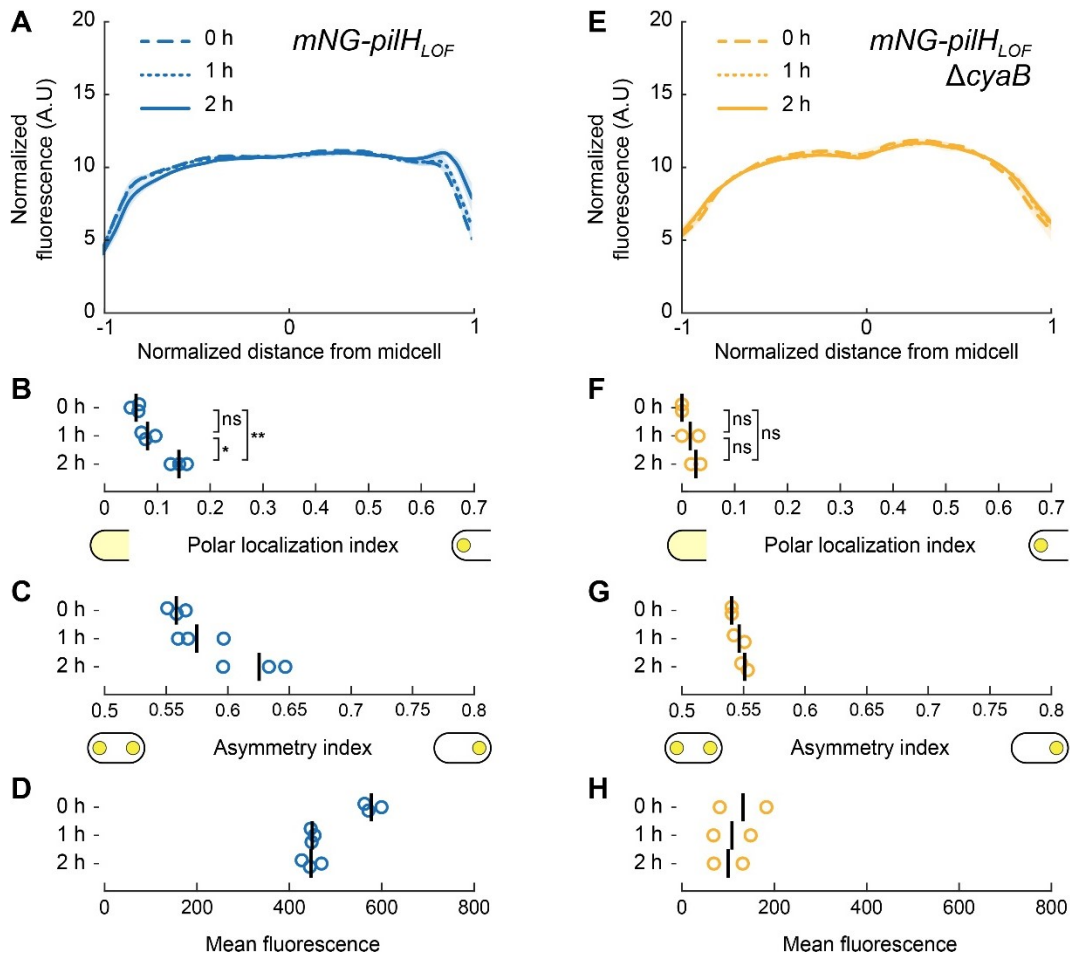

**Appendix Figure S12: PilH locked in its inactive conformation is recruited to the poles upon surface contact.** (A) Time course of localization profiles of mNG-PilH<sub>LOF</sub> in cells grown on solid substrate. Quantification of corresponding (B) polar localization, (C) asymmetry index and (D) mean cellular fluorescence. Like PilH<sub>wt</sub> and PilH<sub>GOF</sub>, PilH<sub>LOF</sub> gets recruited to the poles over time (B). However, the effect is significantly less pronounced, possibly due to saturation effects because of high fluorescent signal. Note, loss-of-function mutation of *pilH* results in high cAMP like in  $\Delta pilH$  (Appendix Figure S11). (E-H) Same analysis in low cAMP ( $\Delta cyaB$ ). Polar recruitment may take place but the effect is too weak to be measured clearly (F). Solid lines, mean normalized fluorescence profiles across biological replicates. Shaded area, standard deviation across biological replicates. Circles, median of each biological replicate. Vertical bars, mean across biological replicates. \*,  $p < 0.05$ ; \*\*,  $p \leq 0.001$ ; ns, not significant.

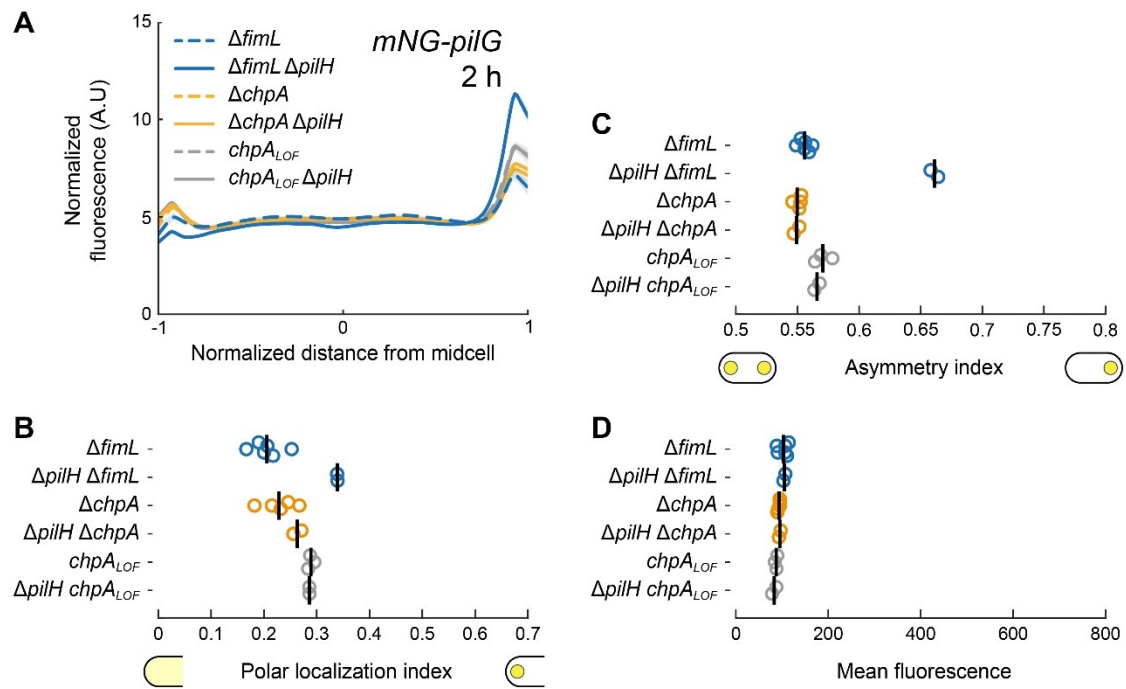

**Appendix Figure S13: PiIH requires functional ChpA but not FimL to modulate PilG polar localization.** (A) Average fluorescence profiles of mNG-PilG after 2h surface growth. (B) Quantification of polar localization, (C) asymmetry index and (D) mean cellular fluorescence. PiIH can repress PilG polar localization only in cells with functional ChpA (only in  $\Delta fimL$ ). Solid lines, mean normalized fluorescence profiles across biological replicates. Shaded area, standard deviation across biological replicates. Circles, median of each biological replicate. Vertical bars, mean across biological replicates.

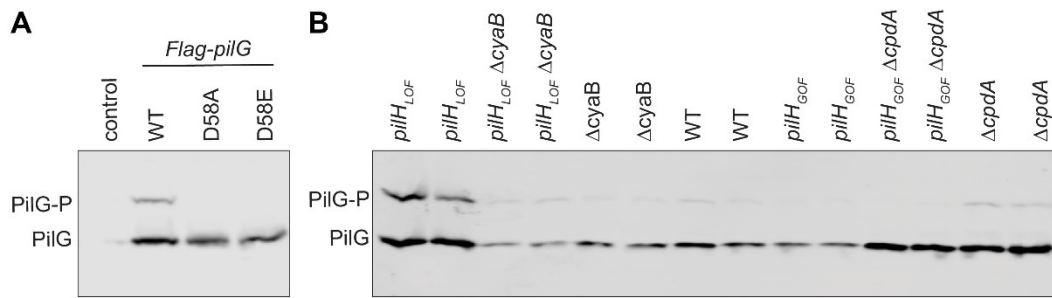

**Appendix Figure S14: Example PhosTag™ western blots.** (A) Representative gel of PiIG and corresponding point mutants that can't get phosphorylated. A slower migrating band corresponding to PiIG-P is detected in whole cell lysates from wild type cells expressing Flag-PiIG but not in cells expressing PiIG with mutations in the phospho-accepting site D58. Control, wild-type PiIG without Flag tag. (B) Representative gel of PiIG in PiIH point mutants and mutants with altered cAMP levels ( $\Delta cpdA$ ,  $\Delta cyaB$ ), corresponding to data shown in Figure 7GH.

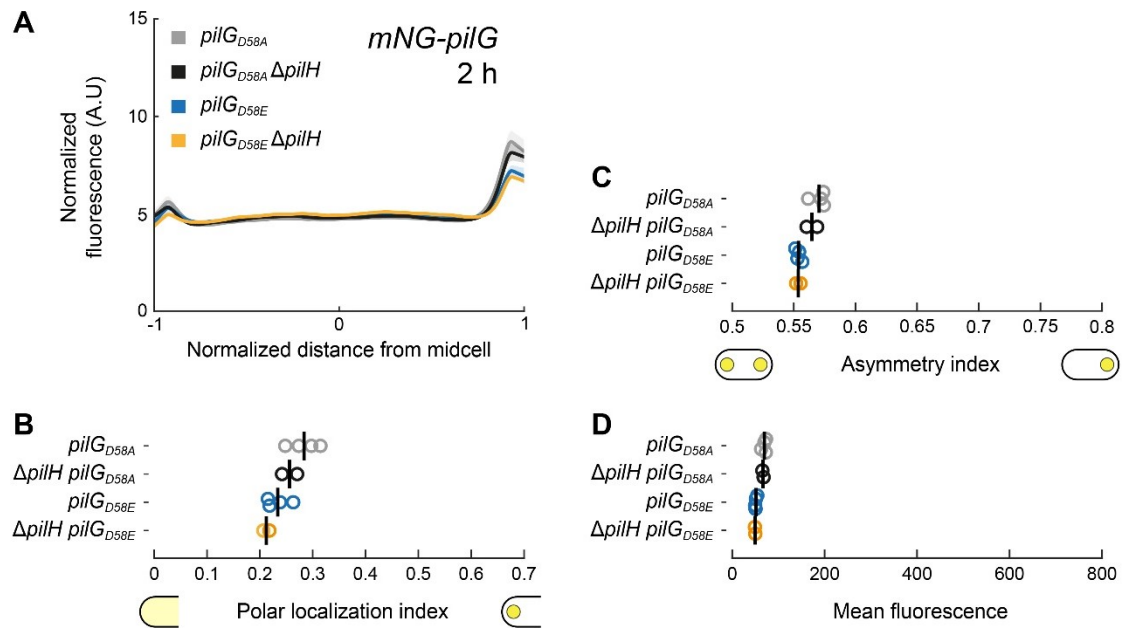

**Appendix Figure S15: PilH has no effect on polar localization of non-phosphorylatable PilG mutants.** (A) Average fluorescence profiles of mNG-PilH point mutants after 2h surface growth. (B) Quantification of polar localization, (C) asymmetry index and (D) mean cellular fluorescence. Solid lines, mean normalized fluorescence profiles across biological replicates. Shaded area, standard deviation across biological replicates. Circles, median of each biological replicate. Vertical bars, mean across biological replicates.



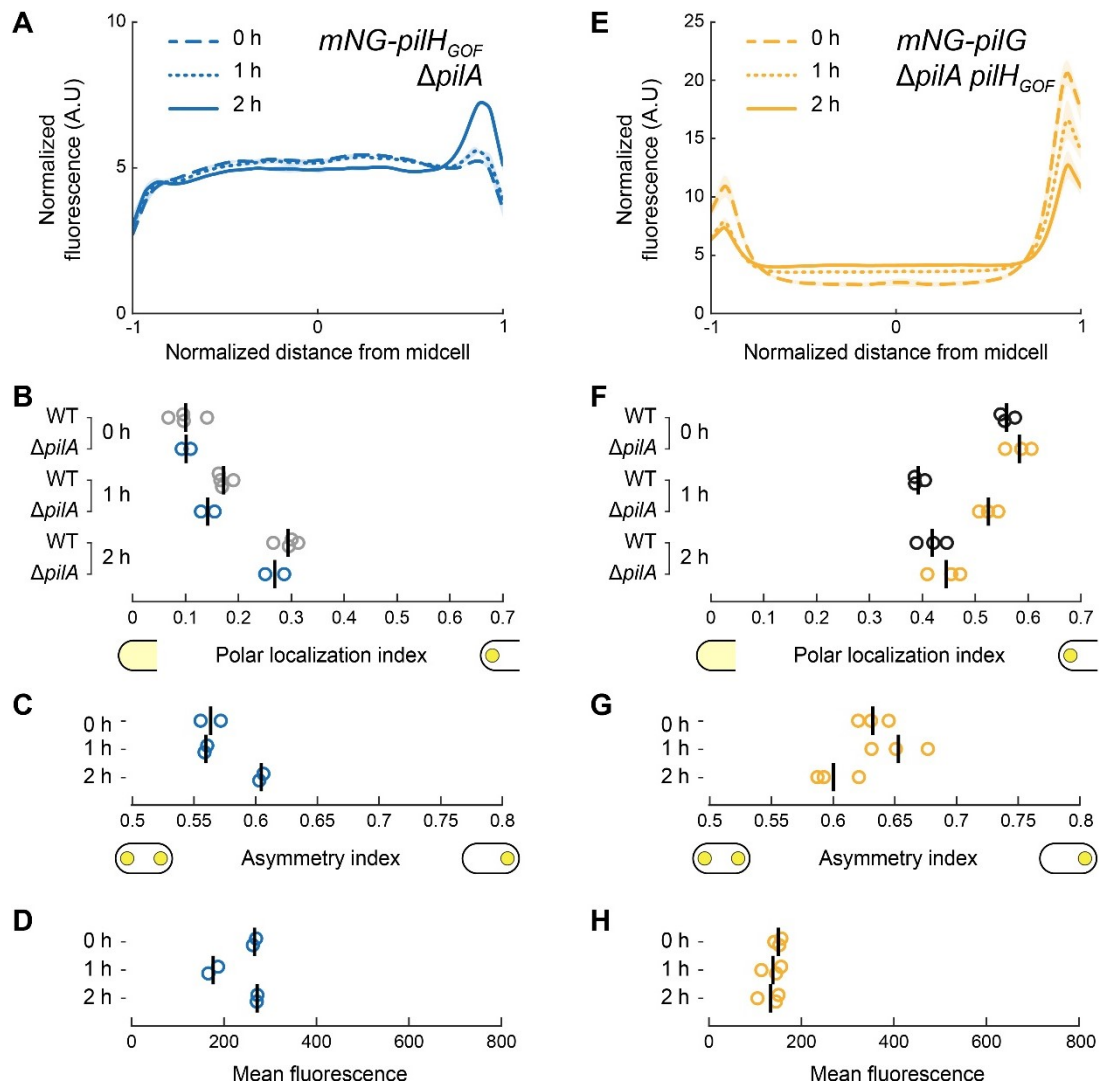

**Appendix Figure S16: PilH<sub>GOF</sub> localization and PilH<sub>GOF</sub>-dependent regulation of PilG in  $\Delta pilA$ .** Time course of localization profiles of (A) mNG-PilH<sub>GOF</sub> in  $\Delta pilA$  and (E) mNG-PilG in  $\Delta pilA pilH_{GOF}$  in cells grown on solid substrate. Quantification of corresponding (B,) polar localization, (C) asymmetry index and (D) mean cellular fluorescence. While the overall localization is similar between WT and  $\Delta pilA$ , the change over time is delayed in  $\Delta pilA$  compared to WT. Solid lines, mean normalized fluorescence profiles across biological replicates. Shaded area, standard deviation across biological replicates. Circles, median of each biological replicate. Vertical bars, mean across biological replicates.

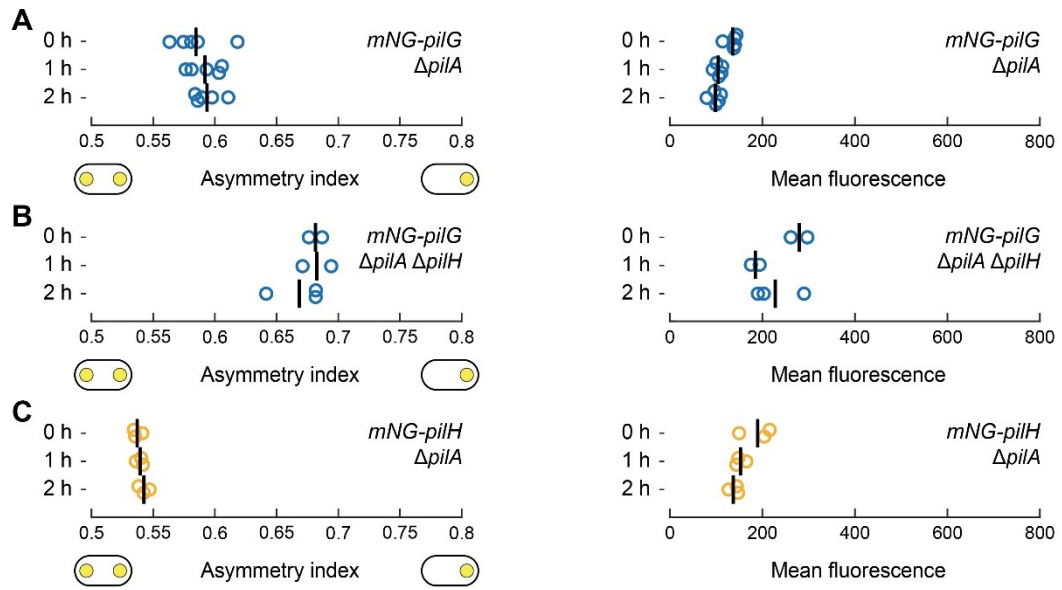

**Appendix Figure S17: Asymmetry indexes and mean cell fluorescence.** Data for (A) *mNG-pilG ΔpilA*, (B) *mNG-pilG ΔpilA ΔpilH*, (C) *mNG-pilH ΔpilA* corresponding to Figure 8. Circles, median of each biological replicate. Vertical bars: mean across biological replicates.

**Appendix Table S1:** Strains used in this study.

| Name and relevant genotype                                                                                                                                                   | Source / Reference                                  | Identifier |
|------------------------------------------------------------------------------------------------------------------------------------------------------------------------------|-----------------------------------------------------|------------|
| <i>Pseudomonas aeruginosa</i> PAO1                                                                                                                                           | (Holloway & Morgan, 1986)                           | ATCC 15692 |
| <i>Escherichia coli</i> DH5 $\alpha$ (hsdR rec lacZYA $\phi$ 80 lacZM15)                                                                                                     | Invitrogen                                          | Na         |
| <i>Escherichia coli</i> strain S17.1 (thi pro hsdR recA RP4-2(Tc::Mu)(Km::Tn7))                                                                                              | Stratagene                                          | Na         |
| PAO1 $\Delta$ <i>fliC</i> (in-frame deletion of PA1092)                                                                                                                      | (Bertrand <i>et al</i> , 2010)                      | 177        |
| PAO1 $\Delta$ <i>pilG</i> (in-frame deletion of PA0408)                                                                                                                      | (Bertrand <i>et al</i> , 2010)                      | 226        |
| PAO1 $\Delta$ <i>pilH</i> (in-frame deletion of PA0409)                                                                                                                      | (Barken <i>et al</i> , 2008)                        | 178        |
| PAO1 $\Delta$ <i>chpA</i> (in-frame deletion PA0413)                                                                                                                         | (Holloway & Morgan, 1986)                           | 170        |
| PAO1 $\Delta$ <i>cyaB</i> (in-frame deletion of PA3217)                                                                                                                      | (Inclan <i>et al</i> , 2011b)                       | 174        |
| PAO1 $\Delta$ <i>cpdA</i> (in-frame deletion of PA4969)                                                                                                                      | (Inclan <i>et al</i> , 2011b)                       | 180        |
| PAO1 $\Delta$ <i>fimL</i> (in-frame deletion of PA1822)                                                                                                                      | (Whitchurch <i>et al</i> , 2005)                    | 179        |
| PAO1 $\Delta$ <i>fliC</i> $\Delta$ <i>cyaB</i>                                                                                                                               | (Kühn <i>et al</i> , 2021)                          | 326        |
| PAO1 $\Delta$ <i>fliC</i> $\Delta$ <i>cpdA</i>                                                                                                                               | (Kühn <i>et al</i> , 2021)                          | 337        |
| PAO1 $\Delta$ <i>fliC</i> $\Delta$ <i>pilG</i>                                                                                                                               | (Kühn <i>et al</i> , 2021)                          | 330        |
| PAO1 $\Delta$ <i>fliC</i> $\Delta$ <i>pilH</i>                                                                                                                               | (Kühn <i>et al</i> , 2021)                          | 232        |
| PAO1 $\Delta$ <i>fliC</i> $\Delta$ <i>pilG</i> $\Delta$ <i>cpdA</i>                                                                                                          | (Kühn <i>et al</i> , 2021)                          | 459        |
| PAO1 $\Delta$ <i>fliC</i> $\Delta$ <i>pilG</i> $\Delta$ <i>pilH</i>                                                                                                          | this study                                          | 553        |
| PAO1 $\Delta$ <i>fliC</i> $\Delta$ <i>pilG</i> $\Delta$ <i>pilH</i> $\Delta$ <i>cpdA</i>                                                                                     | this study                                          | 1278       |
| PAO1 $\Delta$ <i>fliC</i> $\Delta$ <i>chpA</i> $\Delta$ <i>cpdA</i>                                                                                                          | this study                                          | 342        |
| PAO1 $\Delta$ <i>fliC</i> <i>chpA</i> <sub><math>\Delta</math>HK</sub> (deletion of the histidine kinase domain, residues 1943-2176, parent for <i>chpA</i> <sub>LOF</sub> ) | this study                                          | 1511       |
| PAO1 $\Delta$ <i>fliC</i> $\Delta$ <i>cpdA</i> <i>chpA</i> <sub><math>\Delta</math>HK</sub>                                                                                  | this study                                          | 1512       |
| PAO1 $\Delta$ <i>fliC</i> <i>chpA</i> <sub>LOF</sub> (loss-of-function mutations D2086A, D2087A, G2088A)                                                                     | This study, based on (Bertrand <i>et al</i> , 2010) | 1536       |
| PAO1 $\Delta$ <i>fliC</i> $\Delta$ <i>cpdA</i> <i>chpA</i> <sub>LOF</sub>                                                                                                    | this study                                          | 1537       |

|                                                                                                              |                            |      |
|--------------------------------------------------------------------------------------------------------------|----------------------------|------|
| PAO1 $\Delta fliC$ <i>pilG</i> <sub>D58A</sub> $\Delta cpdA$ (loss-of-function mutation D52A)                | this study                 | 1211 |
| PAO1 $\Delta fliC$ <i>pilG</i> <sub>D58E</sub> $\Delta cpdA$ (loss-of-function mutation D58E)                | this study                 | 1171 |
| PAO1 $\Delta fliC$ <i>pilH</i> <sub>LOF</sub> (loss-of-function mutation D52A)                               | this study                 | 1172 |
| PAO1 $\Delta fliC$ <i>pilH</i> <sub>LOF</sub> $\Delta cyaB$                                                  | this study                 | 1166 |
| PAO1 $\Delta fliC$ <i>pilH</i> <sub>GOF</sub> (gain-of-function mutation D52E)                               | this study                 | 1155 |
| PAO1 $\Delta fliC$ <i>pilH</i> <sub>GOF</sub> $\Delta cyaB$                                                  | this study                 | 1167 |
| PAO1 $\Delta fliC$ <i>mNG-pilG</i> (N-terminal fluorescent fusion to mNeonGreen, GGGGG linker, native locus) | (Kühn <i>et al</i> , 2021) | 923  |
| PAO1 $\Delta fliC$ <i>mNG-pilG</i> $\Delta cyaB$                                                             | this study                 | 1098 |
| PAO1 $\Delta fliC$ <i>mNG-pilG</i> $\Delta cpdA$                                                             | this study                 | 1429 |
| PAO1 $\Delta fliC$ <i>mNG-pilH</i> (N-terminal fluorescent fusion to mNeonGreen, GGGGG linker, native locus) | (Kühn <i>et al</i> , 2021) | 315  |
| PAO1 $\Delta fliC$ <i>mNG-pilH</i> $\Delta cyaB$                                                             | this study                 | 1095 |
| PAO1 $\Delta fliC$ <i>mNG-pilH</i> $\Delta cpdA$                                                             | this study                 | 1055 |
| PAO1 $\Delta fliC$ <i>mNG-chpA</i> (N-terminal fluorescent fusion to mNeonGreen, GGGGG linker, native locus) | this study                 | 312  |
| PAO1 $\Delta fliC$ <i>mNG-chpA</i> <sub><math>\Delta HK</math></sub>                                         | this study                 | 1510 |
| PAO1 $\Delta fliC$ <i>mNG-chpA</i> <sub>LOF</sub>                                                            | this study                 | 1535 |
| PAO1 $\Delta fliC$ <i>mNG-pilG</i> $\Delta chpA$                                                             | this study                 | 1423 |
| PAO1 $\Delta fliC$ <i>mNG-pilG</i> $\Delta chpA$ $\Delta cpdA$                                               | this study                 | 1464 |
| PAO1 $\Delta fliC$ <i>mNG-pilG</i> <i>chpA</i> <sub><math>\Delta HK</math></sub>                             | this study                 | 1517 |
| PAO1 $\Delta fliC$ <i>mNG-pilG</i> <i>chpA</i> <sub>LOF</sub>                                                | this study                 | 1542 |
| PAO1 $\Delta fliC$ <i>mNG-pilG</i> <i>chpA</i> <sub><math>\Delta HK</math></sub> $\Delta cpdA$               | this study                 | 1518 |
| PAO1 $\Delta fliC$ <i>mNG-pilG</i> <i>chpA</i> <sub>LOF</sub> $\Delta cpdA$                                  | this study                 | 1578 |
| PAO1 $\Delta fliC$ <i>mNG-pilG</i> $\Delta fimL$                                                             | this study                 | 1045 |
| PAO1 $\Delta fliC$ <i>mNG-pilG</i> $\Delta fimL$ $\Delta pilH$                                               | this study                 | 1602 |
| PAO1 $\Delta fliC$ <i>mNG-pilG</i> $\Delta fimL$ $\Delta chpA$                                               | this study                 | 1433 |
| PAO1 $\Delta fliC$ <i>mNG-pilG</i> $\Delta fimL$ $\Delta chpA$ $\Delta pilH$                                 | this study                 | 1603 |
| PAO1 $\Delta fliC$ <i>mNG-pilG</i> $\Delta fimL$ <i>chpA</i> <sub>LOF</sub>                                  | this study                 | 1693 |
| PAO1 $\Delta fliC$ <i>mNG-pilG</i> $\Delta fimL$ <i>chpA</i> <sub>LOF</sub> $\Delta pilH$                    | this study                 | 1737 |

|                                                               |            |      |
|---------------------------------------------------------------|------------|------|
| PAO1 $\Delta fliC$ mNG-pilG $\Delta pilH$                     | this study | 969  |
| PAO1 $\Delta fliC$ mNG-pilG pilH <sub>LOF</sub>               | this study | 1023 |
| PAO1 $\Delta fliC$ mNG-pilG pilH <sub>GOF</sub>               | this study | 1404 |
| PAO1 $\Delta fliC$ mNG-pilG pilH <sub>GOF</sub> $\Delta pilA$ | this study | 1694 |
| PAO1 $\Delta fliC$ mNG-pilG $\Delta pilA$                     | this study | 1060 |
| PAO1 $\Delta fliC$ mNG-pilG $\Delta pilA$                     | this study | 1604 |
| PAO1 $\Delta fliC$ mNG-pilG $\Delta pilA$ $\Delta pilH$       | this study | 1727 |
| PAO1 mNG-pilG <sub>D58A</sub>                                 | this study | 926  |
| PAO1 mNG-pilG <sub>D58A</sub> $\Delta pilH$                   | this study | 1728 |
| PAO1 mNG-pilG <sub>D58A</sub> $\Delta cpdA$                   | this study | 1406 |
| PAO1 mNG-pilG <sub>D58A</sub> $\Delta chpA$                   | this study | 1689 |
| PAO1 mNG-pilG <sub>D58A</sub> $\Delta fimL$                   | this study | 1692 |
| PAO1 mNG-pilG <sub>D58A</sub> $\Delta chpA$ $\Delta fimL$     | this study | 1734 |
| PAO1 mNG-pilG <sub>D58E</sub>                                 | this study | 925  |
| PAO1 mNG-pilG <sub>D58E</sub> $\Delta pilH$                   | this study | 1729 |
| PAO1 mNG-pilG <sub>D58E</sub> $\Delta cpdA$                   | this study | 1402 |
| PAO1 mNG-pilG <sub>D58E</sub> $\Delta chpA$                   | this study | 1688 |
| PAO1 mNG-pilG <sub>D58E</sub> $\Delta fimL$                   | this study | 1691 |
| PAO1 mNG-pilG <sub>D58E</sub> $\Delta chpA$ $\Delta fimL$     | this study | 1733 |
| PAO1 $\Delta fliC$ mNG-pilH $\Delta chpA$                     | this study | 1058 |
| PAO1 $\Delta fliC$ mNG-pilH $\Delta chpA$ $\Delta cpdA$       | this study | 1406 |
| PAO1 $\Delta fliC$ mNG-pilH chpA <sub>LOF</sub>               | this study | 1582 |
| PAO1 $\Delta fliC$ mNG-pilH chpA <sub>LOF</sub> $\Delta cpdA$ | this study | 1539 |
| PAO1 $\Delta fliC$ mNG-pilH $\Delta pilG$                     | this study | 916  |
| PAO1 $\Delta fliC$ mNG-pilH $\Delta pilG$ $\Delta cpdA$       | this study | 1041 |
| PAO1 $\Delta fliC$ mNG-pilH $\Delta pilA$                     | this study | 1605 |
| PAO1 $\Delta fliC$ mNG-pilH $\Delta pilA$                     | this study | 1669 |
| PAO1 mNG-pilH <sub>LOF</sub>                                  | this study | 990  |
| PAO1 mNG-pilH <sub>LOF</sub> $\Delta cyaB$                    | this study | 1360 |

|                                                                                                                                                  |                            |       |
|--------------------------------------------------------------------------------------------------------------------------------------------------|----------------------------|-------|
| PAO1 mNG- <i>pilH</i> <sub>GOF</sub>                                                                                                             | this study                 | 989   |
| PAO1 $\Delta$ <i>fliC</i> mNG- <i>pilH</i> <sub>GOF</sub>                                                                                        | this study                 | 1355  |
| PAO1 $\Delta$ <i>fliC</i> mNG- <i>pilH</i> <sub>GOF</sub> $\Delta$ <i>pilA</i>                                                                   | this study                 | 1608  |
| PAO1 $\Delta$ <i>fliC</i> mNG- <i>pilH</i> <sub>GOF</sub> $\Delta$ <i>pilA</i>                                                                   | this study                 | 1687  |
| PAO1 $\Delta$ <i>fliC</i> mNG- <i>pilH</i> <sub>GOF</sub> $\Delta$ <i>cpdA</i>                                                                   | this study                 | 1467  |
| PAO1 $\Delta$ <i>fliC</i> mNG- <i>pilH</i> <sub>GOF</sub> $\Delta$ <i>cpdA</i> $\Delta$ <i>chpA</i>                                              | this study                 | 1485  |
| PAO1 $\Delta$ <i>fliC</i> mNG- <i>pilH</i> <sub>GOF</sub> <i>chpA</i> <sub><math>\Delta</math>HK</sub>                                           | this study                 | 1515  |
| PAO1 $\Delta$ <i>fliC</i> mNG- <i>pilH</i> <sub>GOF</sub> <i>chpA</i> <sub><math>\Delta</math>HK</sub> $\Delta$ <i>cpdA</i>                      | this study                 | 1516  |
| PAO1 $\Delta$ <i>fliC</i> mNG- <i>pilH</i> <sub>GOF</sub> <i>chpA</i> <sub>LOF</sub>                                                             | this study                 | 1540  |
| PAO1 $\Delta$ <i>fliC</i> mNG- <i>pilH</i> <sub>GOF</sub> <i>chpA</i> <sub>LOF</sub> $\Delta$ <i>cpdA</i>                                        | this study                 | 1541  |
| PAO1 $\Delta$ <i>fliC</i> PaQa                                                                                                                   | (Kühn <i>et al</i> , 2021) | 764   |
| PAO1 $\Delta$ <i>fliC</i> $\Delta$ <i>cpdA</i> PaQa                                                                                              | (Kühn <i>et al</i> , 2021) | 867   |
| PAO1 $\Delta$ <i>fliC</i> $\Delta$ <i>cyaB</i> PaQa                                                                                              | (Kühn <i>et al</i> , 2021) | 866   |
| PAO1 $\Delta$ <i>fliC</i> $\Delta$ <i>chpA</i> PaQa                                                                                              | this study                 | 1590  |
| PAO1 $\Delta$ <i>fliC</i> $\Delta$ <i>chpA</i> $\Delta$ <i>cpdA</i> PaQa                                                                         | this study                 | 1591  |
| PAO1 $\Delta$ <i>fliC</i> <i>chpA</i> <sub>LOF</sub> PaQa                                                                                        | this study                 | 1580  |
| PAO1 $\Delta$ <i>fliC</i> <i>chpA</i> <sub>LOF</sub> $\Delta$ <i>cpdA</i> PaQa                                                                   | this study                 | 1581  |
| PAO1 $\Delta$ <i>fliC</i> <i>pilA</i> <sub>A86C</sub> (cysteine substitution for maleimide labelling, single point mutation of chromosomal PilA) | this study                 | 1210  |
| PAO1 3xFlag- <i>pilG</i>                                                                                                                         | this study                 | HM540 |
| PAO1 3xFlag- <i>pilG</i> <sub>D58A</sub> (non-phosphorylatable mutant)                                                                           | this study                 | HM543 |
| PAO1 3xFlag- <i>pilG</i> <sub>D58E</sub> (non-phosphorylatable mutant)                                                                           | this study                 | HM545 |
| PAO1 3xFlag- <i>pilG</i> $\Delta$ <i>cpdA</i>                                                                                                    | this study                 | YI974 |
| PAO1 3xFlag- <i>pilG</i> $\Delta$ <i>cyaB</i>                                                                                                    | this study                 | HM620 |
| PAO1 3xFlag- <i>pilG</i> $\Delta$ <i>pilH</i>                                                                                                    | this study                 | HM587 |
| PAO1 3xFlag- <i>pilG</i> <i>pilH</i> <sub>LOF</sub> (non-phosphorylatable mutant)                                                                | this study                 | HM590 |
| PAO1 3xFlag- <i>pilG</i> <i>pilH</i> <sub>GOF</sub> (non-phosphorylatable mutant)                                                                | this study                 | HM592 |
| PAO1 3xFlag- <i>pilG</i> <i>pilH</i> <sub>GOF</sub> $\Delta$ <i>cpdA</i>                                                                         | this study                 | HM664 |
| PAO1 PlacP1-YFP POXB20-mKate2                                                                                                                    | this study                 | HM413 |

|                                                                             |            |       |
|-----------------------------------------------------------------------------|------------|-------|
| PAO1 3xFlag-pilG PlacP1-YFP POXB20-mKate2                                   | this study | HM549 |
| PAO1 3xFlag-pilH PlacP1-YFP POXB20-mKate2                                   | this study | HM438 |
| PAO1 3xFlag-pilH <sub>LOF</sub> PlacP1-YFP POXB20-mKate2                    | this study | HM439 |
| PAO1 3xFlag-pilH <sub>GOF</sub> PlacP1-YFP POXB20-mKate2                    | this study | HM440 |
| PAO1 $\Delta$ pilG PlacP1-YFP POXB20-mKate2                                 | this study | HM421 |
| PAO1 $\Delta$ pilH PlacP1-YFP POXB20-mKate2                                 | this study | HM422 |
| PAO1 $\Delta$ cpdA PlacP1-YFP POXB20-mKate2                                 | this study | HM419 |
| PAO1 $\Delta$ cyaB PlacP1-YFP POXB20-mKate2                                 | this study | HM416 |
| PAO1 3xFlag-pilG $\Delta$ pilH PlacP1-YFP POXB20-mKate2                     | this study | HM603 |
| PAO1 3xFlag-pilG $\Delta$ cpdA PlacP1-YFP POXB20-mKate2                     | this study | HM605 |
| PAO1 3xFlag-pilG $\Delta$ cyaB PlacP1-YFP POXB20-mKate2                     | this study | HM628 |
| PAO1 3xFlag-pilG pilH <sub>LOF</sub> PlacP1-YFP POXB20-mKate2               | this study | HM609 |
| PAO1 3xFlag-pilG pilH <sub>GOF</sub> PlacP1-YFP POXB20-mKate2               | this study | HM611 |
| PAO1 3xFlag-pilG pilH <sub>GOF</sub> $\Delta$ cpdA PlacP1-YFP POXB20-mKate2 | this study | HM678 |
| PAO1 3xFlag-pilG <sub>D58A</sub> PlacP1-YFP POXB20-mKate2                   | this study | HM551 |
| PAO1 3xFlag-pilG <sub>D58E</sub> PlacP1-YFP POXB20-mKate2                   | this study | HM553 |

**Appendix Table S 2:** Plasmids used in this study.

| Name and relevant information                                                                                                                                                     | Source / Reference           | Identifier |
|-----------------------------------------------------------------------------------------------------------------------------------------------------------------------------------|------------------------------|------------|
| pEX100TAP (Suicide vector based on pUC19, Amp <sup>R</sup> , ColE1 ori ( <i>E. coli</i> ), <i>oriT</i> , <i>sacB</i> , <i>lacZ<math>\alpha</math></i> )                           | (Schweizer & Hoang, 1995)    | Na         |
| pEX18AP (Suicide vector based on pUC18, Amp <sup>R</sup> , ColE1 ori ( <i>E. coli</i> ), <i>oriT</i> , <i>sacB</i> , <i>lacZ<math>\alpha</math></i> )                             | (Hoang <i>et al</i> , 1998)  | Na         |
| pEX18GM (Suicide vector based on pUC18, Gm <sup>R</sup> , ColE1 ori ( <i>E. coli</i> ), <i>oriT</i> , <i>sacB</i> , <i>lacZ<math>\alpha</math></i> )                              | (Hoang <i>et al</i> , 1998)  | Na         |
| pUCP18-PaQa (fluorescent reporter for cAMP level: YFP controlled by <i>PaQa</i> promoter (PA1867 and PA1868) and mKate2 controlled by <i>rpoD</i> promoter (PA0576) as reference. | (Persat <i>et al</i> , 2015) | pAP02.2    |
| pUC18_PlacP1-YFP/POXB20-mKate2 (fluorescent reporter for cAMP level: YFP controlled by the synthetic <i>LacP1</i> promoter                                                        | this study                   | YI996      |

|                                                                                                                                     |                                                     |         |
|-------------------------------------------------------------------------------------------------------------------------------------|-----------------------------------------------------|---------|
| and mKate2 controlled by POXB20 promoter (Oxford Genetics Ltd. (UK), Sigma) as reference.                                           |                                                     |         |
| pEx100TAP- $\Delta$ <i>fliC</i> (PA1092)                                                                                            | (Bertrand <i>et al</i> , 2010)                      | pJB215  |
| pEx100TAP- $\Delta$ <i>cpdA</i> (PA4969)                                                                                            | (Inclan <i>et al</i> , 2011a)                       | pJTW033 |
| pEX18GM- $\Delta$ <i>cpdA</i> (PA4969)                                                                                              | (Kühn <i>et al</i> , 2021)                          | pMK019  |
| pEx100TAP- $\Delta$ <i>cyaB</i> (PA3217)                                                                                            | (Inclan <i>et al</i> , 2011a)                       | pJTW031 |
| pEX18GM- $\Delta$ <i>cyaB</i> (PA3217)                                                                                              | (Kühn <i>et al</i> , 2021)                          | pMK018  |
| pEx100TAP- $\Delta$ <i>pilG</i> (PA0408)                                                                                            | (Bertrand <i>et al</i> , 2010)                      | PJB118  |
| pEx100TAP- $\Delta$ <i>pilH</i> (PA0409)                                                                                            | (Bertrand <i>et al</i> , 2010)                      | PJB119  |
| pEX18AP- $\Delta$ <i>pilGH</i> (PA0408 and PA0409 including intergenic region)                                                      | this study                                          | pXP322  |
| pEX18GM- <i>chpA</i> $_{\Delta$ HK (deletion of the histidine kinase domain of PA0413, residues 1943-2176)                          | this study                                          | pMK056  |
| pEX18GM- <i>chpA</i> $_{LOF}$ (insertion of the histidine kinase domain of PA0413 with substituted residues D2086A, D2087A, G2088A) | this study, based on (Bertrand <i>et al</i> , 2010) | pMK057  |
| pEX18AP- <i>pilH</i> $_{LOF}$ (PA0409 with substituted residue D52A)                                                                | this study                                          | pMK012  |
| pEX18AP- <i>pilH</i> $_{GOF}$ (PA0409 with substituted residue D52E)                                                                | this study                                          | pMK013  |
| pEx100TAP- <i>mNG-pilH</i> (PA0409 N-terminus fused with mNeonGreen, GGGGG linker)                                                  | (Kühn <i>et al</i> , 2021)                          | pXP125  |
| pEX18GM- <i>mNG-pilG</i> (PA0408 N-terminus fused with mNeonGreen, GGGGG linker)                                                    | (Kühn <i>et al</i> , 2021)                          | YI883   |
| pEx100TAP- <i>mNG-chpA</i> (PA0413 N-terminus fused with mNeonGreen, GGGGG linker)                                                  | this study                                          | pXP117  |
| pEX18GM- <i>pilA</i> $_{A86C}$ (cysteine-labelled PA4525)                                                                           | this study                                          | pMK025  |
| pEX18GM- <i>mNG-pilH</i> $_{LOF}$ (PA0409 with substituted residue D52A N-terminus fused with mNeonGreen, GGGGG linker)             | this study                                          | YI926   |
| pEx100TAP- <i>mNG-pilH</i> $_{GOF}$ (PA0409 with substituted residue D52E N-terminus fused with mNeonGreen, GGGGG linker)           | this study                                          | HM83    |
| pEX18GM-3xFlag- <i>pilG</i> (PA0408 N-terminus fused with 3xFlag, GGGGG linker)                                                     | this study                                          | HM524   |
| pEX18GM-3xFlag- <i>pilG</i> $_{D58A}$ (PA0408 D58A non-phosphorylatable mutation, N-terminus fused with 3xFlag, GGGGG linker)       | this study                                          | HM526   |



|                                                                                                                                   |            |       |
|-----------------------------------------------------------------------------------------------------------------------------------|------------|-------|
| pEX18GM-3xFlag-pilG <sub>D58E</sub> (PA0408 D58E non-phosphorylatable mutation, N-terminus fused with 3xFlag, GGGGG linker)       | this study | HM536 |
| pEx100TAP-3xFlag-pilH (PA0409 N-terminus fused with 3xFlag, GGGGG linker)                                                         | this study | HM118 |
| pEx100TAP-3xFlag-pilH <sub>LOF</sub> (PA0409 with substituted residue D52A N-terminus fused with 3xFlag, GGGGG linker)            | this study | HM169 |
| pEx100TAP-3xFlag-pilH <sub>GOE</sub> (PA0409 with substituted residue D52E N-terminus fused with 3xFlag, GGGGG linker)            | this study | HM171 |
| pEX18GM-3xFlag-pilG $\Delta$ pilH (PA0408 N-terminus fused with 3xFlag, GGGGG linker, and in-frame deletion of PA0409)            | this study | HM577 |
| pEX18GM 3xFlag-pilG pilH <sub>LOF</sub> (PA0408 N-terminus fused with 3xFlag, GGGGG linker, PA0409 with substituted residue D52A) | this study | HM583 |
| pEX18GM 3xFlag-pilG pilH <sub>GOE</sub> (PA0408 N-terminus fused with 3xFlag, GGGGG linker, PA0409 with substituted residue D52E) | this study | HM581 |
| pEX18GM- $\Delta$ fimL                                                                                                            | this study | pMK59 |
| pEX18GM- $\Delta$ pilH for mNG-pilG <sub>D58A</sub>                                                                               | this study | pMK60 |
| pEX18GM- $\Delta$ pilH for mNG-pilG <sub>D58E</sub>                                                                               | this study | pMK61 |
| pEX18GM- $\Delta$ pilH for mNG-pilG                                                                                               | this study | pMK62 |

**Appendix Table S 3:** Oligonucleotides used in this study.

| Identifier | Sequence                                                 | Purpose                 |
|------------|----------------------------------------------------------|-------------------------|
| oXP794     | ATG ACC ATG ATT ACG AAT TCC AGT TCG<br>TGC AGC GG        | Generation of pXP322    |
| oXP795     | GCT GCG ACG GGC TCA CAT GTT CGC CCT<br>ATA TCG AC        | Generation of pXP322    |
| oXP796     | TAT AGG GCG AAC ATG TGA GCC CGT CGC<br>AGC               | Generation of pXP322    |
| oXP797     | GCC TGC AGG TCG ACT CTA GAA ATG AAG<br>GGT TGC AGT GC    | Generation of pXP322    |
| oMK136     | TGC ATG CCT GCA GGT CGA CTG ATC CTG<br>CAC ACC CTC AAG G | Generation of pMK056/57 |
| oMK137     | GGT TCA CCG ACT GCA ACT GCG AAT AGC GG                   | Generation of pMK056    |

|        |                                                          |                                                      |
|--------|----------------------------------------------------------|------------------------------------------------------|
| oMK138 | GCA GTT GCA GTC GGT GAA CCG GGC GCT G                    | Generation of pMK056                                 |
| oMK139 | CAG CTA TGA CCA TGA TTA CGA ACC GTC<br>CAT GCG CGG CAT C | Generation of pMK056/57                              |
| oMK142 | CCG GCC GCG GCC GCG GAG AGG GTG AGG<br>AGG ATG           | Generation of pMK057                                 |
| oMK143 | CTC TCC GCG GCC GCG GCC GGC ATC CGC<br>CTC GAC           | Generation of pMK057                                 |
| oMK140 | TGC TGG AGA ACC TCG AAC TG                               | Check <i>chpA<sub>HK</sub></i> locus                 |
| oMK141 | TGA TCA TGA TGA TCG GCA GG                               | Check <i>chpA<sub>HK</sub></i> locus                 |
| oMK039 | CAT GCC TGC AGG TCG ACT CAC AGA GGG<br>ATG ACC CGG       | Generation of pMK052                                 |
| oMK042 | GCT ATG ACC ATG ATT ACG CGG TGG AAG<br>TGG AAG TGG       | Generation of pMK052                                 |
| oMK062 | GAG CCG GAT TGC AAC AAG TTG GGT GTA<br>ATT GC            | Generation of pMK052                                 |
| oMK063 | AAC TTG TTG CAA TCC GGC TCG ACG CCG                      | Generation of pMK052                                 |
| oLT040 | GTA TCG ACC GGG CAA TTG C                                | Check <i>pilA</i> locus                              |
| oLT043 | CTC TTG GGT GGA CTT GTC                                  | Check <i>pilA</i> locus                              |
| YIp276 | GGC GCG GCA TCA TGA TGG CGA CGA AAA<br>TGA TGT TC        | Generation of <i>pilG<sub>D58A</sub></i><br>mutation |
| YIp277 | GAA CAT CAT TTT CGT CGC CAT CAT GAT<br>GCC GCG CC        | Generation of <i>pilG<sub>D58A</sub></i><br>mutation |
| YIp284 | AGG CGC GGC ATC ATG ATT TCG ACG AAA<br>ATG ATG TT        | Generation of <i>pilG<sub>D58E</sub></i><br>mutation |
| YIp285 | AAC ATC ATT TTC GTC GAA ATC ATG ATG CCG<br>CGC CT        | Generation of <i>pilG<sub>D58E</sub></i><br>mutation |
| YIp280 | CGG GCA TGA CGA TGG CCA TCA GGA CCA<br>CG                | Generation of <i>pilH<sub>D52A</sub></i><br>mutation |
| YIp281 | CGT GGT CCT GAT GGC CAT CGT CAT GCC CG                   | Generation of <i>pilH<sub>D52A</sub></i><br>mutation |
| YIp282 | CCG GGC ATG ACG ATT TCC ATC AGG ACC AC                   | Generation of <i>pilH<sub>D52E</sub></i><br>mutation |

|        |                                                                                                               |                                                        |
|--------|---------------------------------------------------------------------------------------------------------------|--------------------------------------------------------|
| Ylp283 | GTG GTC CTG ATG GAA ATC GTC ATG CCC GG                                                                        | Generation of <i>pilH</i> <sub>D52E</sub> mutation     |
| hm66   | GTA GTC ATC GAT TTT GTC ATC GTC TTT GTA<br>GTC GGC GGC TTT GTC ATC GTC TTT GTA<br>GTC GTT CGC CCT ATA TCG ACT | Generation of 3xFlag- <i>pilG</i>                      |
| hm67   | TAC AAA GAC GAT GAC AAA ATC GAT GAC<br>TAC AAA GAC GAT GAC AAA GGC GGC GGC<br>GGC GGC ATG GAA CAG CAA TCC GAC | Generation of 3xFlag- <i>pilG</i>                      |
| hm75   | TAT TTC GTG ATG GGG ATC CCA TGG CTC<br>GTA TAA GCT TCA CCA CCA AGG ACC AG                                     | Generation of 3xFlag- <i>pilG</i> $\Delta$ <i>pilH</i> |
| hm76   | CGA CGG CCA GTG CCA AGC TTT CGG GGC<br>TGG GCG GCA GG                                                         | Generation of 3xFlag- <i>pilG</i> $\Delta$ <i>pilH</i> |
| hm52   | AAG CTT GGC ACT GGC CGTC                                                                                      | Generation of 3xFlag- <i>pilG</i> $\Delta$ <i>pilH</i> |
| hm53   | GGG ATC CCC ATC ACG AAA TAA G                                                                                 | Generation of 3xFlag- <i>pilG</i> $\Delta$ <i>pilH</i> |

**Appendix Table S4:** Number of measured, segmented or tracked cells for microscopy and flow cytometry experiments. If not indicated otherwise, numbers correspond to 2h data.

| Figure | Identifier / strain                                                                                                                                   | Replicates           | Number cells                 |
|--------|-------------------------------------------------------------------------------------------------------------------------------------------------------|----------------------|------------------------------|
| 1 A    | 923 $\Delta$ <i>fliC</i> <i>mNG-pilG</i><br>315 $\Delta$ <i>fliC</i> <i>mNG-pilH</i>                                                                  | 1<br>1               | 42<br>42                     |
| 1 C-E  | 923 $\Delta$ <i>fliC</i> <i>mNG-pilG</i>                                                                                                              | 0h 8<br>1h 8<br>2h 8 | 0h 880<br>1h 1984<br>2h 4073 |
| 1 F-H  | 315 $\Delta$ <i>fliC</i> <i>mNG-pilH</i>                                                                                                              | 0h 6<br>1h 5<br>2h 6 | 0h 654<br>1h 846<br>2h 1930  |
| 2 A-C  | 1423 $\Delta$ <i>fliC</i> <i>mNG-pilG</i> $\Delta$ <i>chpA</i><br>1542 $\Delta$ <i>fliC</i> <i>mNG-pilG</i> <i>chpA</i> <sub>LOF</sub>                | 3<br>3               | 1403<br>1009                 |
| 2 D-F  | 1045 $\Delta$ <i>fliC</i> <i>mNG-pilG</i> $\Delta$ <i>fimL</i><br>1433 $\Delta$ <i>fliC</i> <i>mNG-pilG</i> $\Delta$ <i>fimL</i> $\Delta$ <i>chpA</i> | 3<br>2               | 1509<br>842                  |

|        |                                                                                                                                                                                                                                                                  |                                                  |                                                               |
|--------|------------------------------------------------------------------------------------------------------------------------------------------------------------------------------------------------------------------------------------------------------------------|--------------------------------------------------|---------------------------------------------------------------|
| 3      | 1055 $\Delta fliC$ <i>mNG-pilH</i> $\Delta cpdA$<br>1406 $\Delta fliC$ <i>mNG-pilH</i> $\Delta cpdA$ $\Delta chpA$<br>1539 $\Delta fliC$ <i>mNG-pilH</i> $\Delta cpdA$ <i>chpA</i> <sub>LOF</sub>                                                                | 3<br>3<br>3                                      | 526<br>734<br>813                                             |
| 4 A, B | 989 <i>mNG-pilH</i> <sub>GOF</sub> / 1355 $\Delta fliC$ <i>mNG-pilH</i> <sub>GOF</sub>                                                                                                                                                                           | 0h 4<br>1h 4<br>2h 4                             | 0h 432<br>1h 618<br>2h 909                                    |
| 4 C, D | 1467 $\Delta fliC$ <i>mNG-pilH</i> <sub>GOF</sub> $\Delta cpdA$<br>1485 $\Delta fliC$ <i>mNG-pilH</i> <sub>GOF</sub> $\Delta cpdA$ $\Delta chpA$<br>1541 $\Delta fliC$ <i>mNG-pilH</i> <sub>GOF</sub> $\Delta cpdA$ <i>chpA</i> <sub>LOF</sub>                   | 3<br>2<br>3                                      | 639<br>618<br>788                                             |
| 5 C-G  | 337 $\Delta fliC$ $\Delta cpdA$<br>342 $\Delta fliC$ $\Delta cpdA$ $\Delta chpA$<br>1537 $\Delta fliC$ $\Delta cpdA$ <i>chpA</i> <sub>LOF</sub><br>459 $\Delta fliC$ $\Delta cpdA$ $\Delta pilG$<br>1278 $\Delta fliC$ $\Delta cpdA$ $\Delta pilG$ $\Delta pilH$ | 3<br>3<br>3<br>3<br>3                            | 50<br>50<br>50<br>50<br>50                                    |
| 5 H    | 337 $\Delta fliC$ $\Delta cpdA$<br>342 $\Delta fliC$ $\Delta cpdA$ $\Delta chpA$<br>1537 $\Delta fliC$ $\Delta cpdA$ <i>chpA</i> <sub>LOF</sub><br>459 $\Delta fliC$ $\Delta cpdA$ $\Delta pilG$<br>1278 $\Delta fliC$ $\Delta cpdA$ $\Delta pilG$ $\Delta pilH$ | 20<br>4<br>3<br>9<br>4                           | 30246<br>6444<br>871<br>7474<br>3700                          |
| 6 A, B | 1095 $\Delta fliC$ <i>mNG-pilH</i> $\Delta cyaB$<br><br>916 $\Delta fliC$ <i>mNG-pilH</i> $\Delta pilG$                                                                                                                                                          | 0h 3<br>1h 3<br>2h 3<br><br>0h 2<br>1h 1<br>2h 2 | 0h 378<br>1h 657<br>2h 1235<br><br>0h 182<br>1h 177<br>2h 393 |
| 6 C, D | 1055 $\Delta fliC$ <i>mNG-pilH</i> $\Delta cpdA$<br><br>1041 $\Delta fliC$ <i>mNG-pilH</i> $\Delta cpdA$ $\Delta pilG$                                                                                                                                           | 0h 3<br>1h 2<br>2h 3<br><br>0h 2<br>1h 1<br>2h 2 | 0h 181<br>1h 234<br>2h 526<br><br>0h 86<br>1h 32<br>2h 222    |
| 7 A-C  | 1429 $\Delta fliC$ <i>mNG-pilG</i> $\Delta cpdA$<br>969 $\Delta fliC$ <i>mNG-pilG</i> $\Delta pilH$<br>1023 $\Delta fliC$ <i>mNG-pilG</i> <i>pilH</i> <sub>LOF</sub>                                                                                             | 2h 3<br><br>0h 3<br>2h 3<br><br>0h 3<br>2h 3     | 2h 534<br><br>0h 351<br>2h 722<br><br>0h 265<br>2h 511        |

|        |                                                                                                                                                                                                                                                                                                                                      |                                                                                                                                      |                                                                                                                                                             |
|--------|--------------------------------------------------------------------------------------------------------------------------------------------------------------------------------------------------------------------------------------------------------------------------------------------------------------------------------------|--------------------------------------------------------------------------------------------------------------------------------------|-------------------------------------------------------------------------------------------------------------------------------------------------------------|
| 7 D-F  | 1404 $\Delta fliC$ <i>mNG-pilG pilH<sub>GOF</sub></i>                                                                                                                                                                                                                                                                                | 0h 3<br>1h 3<br>2h 3                                                                                                                 | 0h 462<br>1h 846<br>2h 1376                                                                                                                                 |
| 8 A, B | 1060/1604 $\Delta fliC$ <i>mNG-pilG <math>\Delta pilA</math></i>                                                                                                                                                                                                                                                                     | 0h 5<br>1h 5<br>2h 5                                                                                                                 | 0h 854<br>1h 977<br>2h 1684                                                                                                                                 |
| 8 C, D | 1605/1669 $\Delta fliC$ <i>mNG-pilH <math>\Delta pilA</math></i>                                                                                                                                                                                                                                                                     | 0h 3<br>1h 3<br>2h 3                                                                                                                 | 0h 908<br>1h 854<br>2h 1082                                                                                                                                 |
| 8 E, F | 969 $\Delta fliC$ <i>mNG-pilG <math>\Delta pilH</math></i><br>1727 $\Delta fliC$ <i>mNG-pilG <math>\Delta pilA</math> <math>\Delta pilH</math></i>                                                                                                                                                                                   | 1h 3<br>0h 2<br>1h 2<br>2h 3                                                                                                         | 1h 625<br>0h 274<br>1h 252<br>2h 542                                                                                                                        |
| 8 H    | 923 $\Delta fliC$ <i>mNG-pilG</i><br><br>1060/1604 $\Delta fliC$ <i>mNG-pilG <math>\Delta pilA</math></i><br><br>969 $\Delta fliC$ <i>mNG-pilG <math>\Delta pilH</math></i><br><br>1023 $\Delta fliC$ <i>mNG-pilG pilH<sub>LOF</sub></i><br><br>1727 $\Delta fliC$ <i>mNG-pilG <math>\Delta pilA</math> <math>\Delta pilH</math></i> | 10 min 3<br>70 min 3<br><br>10 min 3<br>70 min 3<br><br>10 min 2<br>70 min 2<br><br>10 min 2<br>70 min 2<br><br>10 min 3<br>70 min 3 | 10 min 575<br>70 min 1765<br><br>10 min 480<br>70 min 552<br><br>10 min 501<br>70 min 1242<br><br>10 min 561<br>70 min 1866<br><br>10 min 352<br>70 min 366 |
| S3     | 312 $\Delta fliC$ <i>mNG-chpA</i><br>1535 $\Delta fliC$ <i>mNG-chpA<sub>LOF</sub></i>                                                                                                                                                                                                                                                | 2<br>2                                                                                                                               | 424<br>587                                                                                                                                                  |
| S4     | 764 $\Delta fliC$ PaQa<br><br>866 $\Delta fliC$ $\Delta cyaB$ PaQa<br><br>867 $\Delta fliC$ $\Delta cpdA$ PaQa<br><br>1590 $\Delta fliC$ $\Delta chpA$ PaQa                                                                                                                                                                          | liquid 3<br>solid 3<br><br>liquid 2<br>solid 2<br><br>liquid 2<br>solid 2<br><br>liquid 2<br>solid 2                                 | liquid 1356<br>solid 672<br><br>liquid 532<br>solid 429<br><br>liquid 499<br>solid 258<br><br>liquid 493<br>solid 425                                       |

|                                  |                                                                                                                                                                                                     |                                                                           |                                                                                       |
|----------------------------------|-----------------------------------------------------------------------------------------------------------------------------------------------------------------------------------------------------|---------------------------------------------------------------------------|---------------------------------------------------------------------------------------|
|                                  | 1591 $\Delta fliC \Delta chpA \Delta cpdA$ PaQa<br><br>1580 $\Delta fliC chpA_{LOF}$ PaQa<br><br>1581 $\Delta fliC chpA_{LOF} \Delta cpdA$ PaQa                                                     | liquid 2<br>solid 2<br><br>liquid 2<br>solid 2<br><br>liquid 2<br>solid 2 | liquid 696<br>solid 316<br><br>liquid 491<br>solid 453<br><br>liquid 457<br>solid 290 |
| S5                               | 1098 $\Delta fliC mNG-pilG \Delta cyaB$<br><br>1429 $\Delta fliC mNG-pilG \Delta cpdA$                                                                                                              | 0h 3<br>1h 3<br>2h 3<br><br>0h 3<br>1h 3<br>2h 3                          | 0h 372<br>1h 659<br>2h 1404<br><br>0h 330<br>1h 450<br>2h 534                         |
| S6                               | 1045 $\Delta fliC mNG-pilG \Delta fimL$<br>1693 $\Delta fliC mNG-pilG \Delta fimL chpA_{LOF}$                                                                                                       | 6<br>3                                                                    | 2247<br>1801                                                                          |
| S7 A,C,E,G                       | 1098 $\Delta fliC mNG-pilG \Delta cyaB$<br>926 $\Delta fliC mNG-pilG_{D58A}$<br>925 $\Delta fliC mNG-pilG_{D58E}$                                                                                   | 3<br>4<br>4                                                               | 1404<br>1526<br>1363                                                                  |
| S7 B,D,F,G                       | 1429 $\Delta fliC mNG-pilG \Delta cpdA$<br>1403 $\Delta fliC mNG-pilG_{D58A} \Delta cpdA$<br>1402 $\Delta fliC mNG-pilG_{D58E} \Delta cpdA$                                                         | 3<br>4<br>4                                                               | 534<br>1350<br>1184                                                                   |
| S8 A,C,E,G                       | 926 $\Delta fliC mNG-pilG_{D58A}$<br>1689 $\Delta fliC mNG-pilG_{D58A} \Delta chpA$<br>1692 $\Delta fliC mNG-pilG_{D58A} \Delta fimL$<br>1734 $\Delta fliC mNG-pilG_{D58A} \Delta chpA \Delta fimL$ | 4<br>2<br>2<br>2                                                          | 1526<br>1206<br>1193<br>923                                                           |
| S8 B,D,F,G                       | 925 $\Delta fliC mNG-pilG_{D58E}$<br>1688 $\Delta fliC mNG-pilG_{D58E} \Delta chpA$<br>1691 $\Delta fliC mNG-pilG_{D58E} \Delta fimL$<br>1733 $\Delta fliC mNG-pilG_{D58E} \Delta chpA \Delta fimL$ | 4<br>2<br>2<br>2                                                          | 1363<br>1546<br>1374<br>756                                                           |
| S9 A                             | 337 $\Delta fliC \Delta cpdA$<br>459 $\Delta fliC \Delta cpdA \Delta pilG$<br>1211 $\Delta fliC \Delta cpdA pilG_{D58A}$<br>1171 $\Delta fliC \Delta cpdA pilG_{D58E}$                              | 20<br>9<br>3<br>3                                                         | 30246<br>7474<br>866<br>1597                                                          |
| S9 B<br>(1000 cells<br>randomly) | HM413 PlacP1-YFP                                                                                                                                                                                    | liquid 4<br>solid 5                                                       | liquid 4000<br>solid 5000                                                             |

|                                                                |                                                  |                     |                           |
|----------------------------------------------------------------|--------------------------------------------------|---------------------|---------------------------|
| selected per replicate)                                        | HM421 $\Delta pilG$ PlacP1-YFP                   | liquid 2<br>solid 2 | liquid 2000<br>solid 2000 |
|                                                                | HM549 <i>flag-pilG</i> PlacP1-YFP                | liquid 4<br>solid 5 | liquid 4000<br>solid 5000 |
|                                                                | HM551 <i>flag-pilG<sub>D58A</sub></i> PlacP1-YFP | liquid 3<br>solid 3 | liquid 3000<br>solid 3000 |
|                                                                | HM553 <i>flag-pilG<sub>D58E</sub></i> PlacP1-YFP | liquid 2<br>solid 2 | liquid 2000<br>solid 2000 |
| S10                                                            | 1095 $\Delta fliC$ <i>mNG-pilH</i> $\Delta cyaB$ | 3<br>3<br>3         | 378<br>657<br>1235        |
| S10                                                            | 1055 $\Delta fliC$ <i>mNG-pilH</i> $\Delta cpdA$ | 3<br>2<br>3         | 181<br>234<br>526         |
| S11 A<br>spontaneous<br>reversals                              | 177 $\Delta fliC$                                | 27                  | 31821                     |
|                                                                | 232 $\Delta fliC$ $\Delta pilH$                  | 8                   | 8215                      |
|                                                                | 1172 $\Delta fliC$ <i>pilH<sub>LOF</sub></i>     | 3                   | 3087                      |
|                                                                | 1155 $\Delta fliC$ <i>pilH<sub>GOF</sub></i>     | 3                   | 2278                      |
| S11 A<br>collisions                                            | 177 $\Delta fliC$                                | 3                   | 239                       |
|                                                                | 232 $\Delta fliC$ $\Delta pilH$                  | 3                   | 188                       |
|                                                                | 1172 $\Delta fliC$ <i>pilH<sub>LOF</sub></i>     | 3                   | 157                       |
|                                                                | 1155 $\Delta fliC$ <i>pilH<sub>GOF</sub></i>     | 3                   | 216                       |
| S11 B<br>(1000 cells<br>randomly<br>selected per<br>replicate) | HM413 PlacP1-YFP                                 | liquid 4<br>solid 5 | liquid 4000<br>solid 5000 |
|                                                                | HM422 $\Delta pilH$ PlacP1-YFP                   | liquid 4<br>solid 5 | liquid 4000<br>solid 5000 |
|                                                                | HM438 <i>flag-pilH</i> PlacP1-YFP                | liquid 3<br>solid 3 | liquid 3000<br>solid 3000 |
|                                                                | HM439 <i>flag-pilH<sub>LOF</sub></i> PlacP1-YFP  | liquid 3<br>solid 3 | liquid 3000<br>solid 3000 |
|                                                                | HM440 <i>flag-pilH<sub>GOF</sub></i> PlacP1-YFP  | liquid 3<br>solid 3 | liquid 3000<br>solid 3000 |
| S12 A-D                                                        | 990 $\Delta fliC$ <i>mNG-pilH<sub>LOF</sub></i>  | 0h 3                | 0h 331                    |
|                                                                |                                                  | 1h 3                | 1h 378                    |
|                                                                |                                                  | 2h 3                | 2h 633                    |

|         |                                                                                                                                                                                                                                                                                                                                                                                        |                                                  |                                                              |
|---------|----------------------------------------------------------------------------------------------------------------------------------------------------------------------------------------------------------------------------------------------------------------------------------------------------------------------------------------------------------------------------------------|--------------------------------------------------|--------------------------------------------------------------|
| S12 E-H | 1360 $\Delta fliC$ <i>mNG-pilH<sub>LOF</sub></i> $\Delta cyaB$                                                                                                                                                                                                                                                                                                                         | 0h 2<br>1h 2<br>2h 2                             | 0h 321<br>1h 434<br>2h 1044                                  |
| S13     | 1045 $\Delta fliC$ <i>mNG-pilG</i> $\Delta fimL$<br>1602 $\Delta fliC$ <i>mNG-pilG</i> $\Delta fimL$ $\Delta pilH$<br>1423 $\Delta fliC$ <i>mNG-pilG</i> $\Delta chpA$<br>1603 $\Delta fliC$ <i>mNG-pilG</i> $\Delta chpA$ $\Delta pilH$<br>1542 $\Delta fliC$ <i>mNG-pilG</i> <i>chpA<sub>LOF</sub></i><br>1737 $\Delta fliC$ <i>mNG-pilG</i> <i>chpA<sub>LOF</sub></i> $\Delta pilH$ | 6<br>2<br>5<br>2<br>3<br>2                       | 2247<br>726<br>2180<br>863<br>1009<br>959                    |
| S15     | 926 $\Delta fliC$ <i>mNG-pilG<sub>D58A</sub></i><br>1728 $\Delta fliC$ <i>mNG-pilG<sub>D58A</sub></i> $\Delta pilH$<br>925 $\Delta fliC$ <i>mNG-pilG<sub>D58E</sub></i><br>1729 $\Delta fliC$ <i>mNG-pilG<sub>D58E</sub></i> $\Delta pilH$                                                                                                                                             | 4<br>2<br>4<br>2                                 | 1526<br>1173<br>1363<br>892                                  |
| S16     | 1608/1687 $\Delta fliC$ <i>mNG-pilH<sub>GOF</sub></i> $\Delta pilA$<br><br>1694 $\Delta fliC$ <i>mNG-pilG</i> $\Delta pilA$ <i>pilH<sub>GOF</sub></i>                                                                                                                                                                                                                                  | 0h 2<br>1h 2<br>2h 2<br><br>0h 3<br>1h 3<br>2h 3 | 0h 261<br>1h 237<br>2h 176<br><br>0h 561<br>1h 704<br>2h 978 |



## References for Appendix

- Barken KB, Pamp SJ, Yang L, Gjermansen M, Bertrand JJ, Klausen M, Givskov M, Whitchurch CB, Engel JN & Tolker-Nielsen T (2008) Roles of type IV pili, flagellum-mediated motility and extracellular DNA in the formation of mature multicellular structures in *Pseudomonas aeruginosa* biofilms. *Environmental Microbiology* 10: 2331–2343
- Bertrand JJ, West JT & Engel JN (2010) Genetic Analysis of the Regulation of Type IV Pilus Function by the Chp Chemosensory System of *Pseudomonas aeruginosa*. *Journal of Bacteriology* 192: 994–1010
- Fulcher NB, Holliday PM, Klem E, Cann MJ & Wolfgang MC (2010) The *Pseudomonas aeruginosa* Chp chemosensory system regulates intracellular cAMP levels by modulating adenylate cyclase activity: Regulation of cAMP by a chemosensory system. *Molecular Microbiology* 76: 889–904
- Hoang TT, Karkhoff-Schweizer RR, Kutchma AJ & Schweizer HP (1998) A broad-host-range Flp-FRT recombination system for site-specific excision of chromosomally-located DNA sequences: application for isolation of unmarked *Pseudomonas aeruginosa* mutants. *Gene* 212: 77–86
- Holloway BW & Morgan AF (1986) Genome Organization in *Pseudomonas*. *Annu Rev Microbiol* 40: 79–105
- Inclan YF, Huseby MJ & Engel JN (2011a) FimL Regulates cAMP Synthesis in *Pseudomonas aeruginosa*. *PLoS ONE* 6: e15867
- Inclan YF, Huseby MJ & Engel JN (2011b) FimL Regulates cAMP Synthesis in *Pseudomonas aeruginosa*. *PLoS ONE* 6: e15867
- Kühn MJ, Talà L, Inclan YF, Patino R, Pierrat X, Vos I, Al-Mayyah Z, Macmillan H, Negrete J, Engel JN, *et al* (2021) Mechanotaxis directs *Pseudomonas aeruginosa* twitching motility. *Proc Natl Acad Sci USA* 118: e2101759118
- Persat A, Inclan YF, Engel JN, Stone HA & Gitai Z (2015) Type IV pili mechanochemically regulate virulence factors in *Pseudomonas aeruginosa*. *Proceedings of the National Academy of Sciences of the United States of America* 112: 7563–7568
- Schweizer HP & Hoang TT (1995) An improved system for gene replacement and xylE fusion analysis in *Pseudomonas aeruginosa*. *Gene* 158: 15–22
- Whitchurch CB, Beatson SA, Comolli JC, Jakobsen T, Sargent JL, Bertrand JJ, West J, Klausen M, Waite LL, Kang PJ, *et al* (2005) *Pseudomonas aeruginosa* fimL regulates multiple virulence functions by intersecting with Vfr-modulated pathways: FimL is required for multiple virulence functions. *Molecular Microbiology* 55: 1357–1378
